# Supplementary material for: 4-Cyano-5-(2-thiophenyl)-pyrazoles are high affinity CB1receptor ligands
Source: Royal Society of Chemistry journal article supplement (doi:10.1039/c4ra17274d), 2015-01-01

Supporting information for

# 4-Cyano-5-(2-Thiophenyl)-Pyrazoles are High Affinity CB1 Receptor Ligands

Stefano Altomonte,<sup>\*,[a]</sup> Gemma L. Baillie,<sup>[b]</sup> Ruth A. Ross,<sup>[b]</sup> and Matteo Zanda<sup>\*,[a,c]</sup>

<sup>a</sup> Dr. S. Altomonte, Professor Dr. M. Zanda, Kosterlitz Centre for Therapeutics, Institute of Medical Sciences, University of Aberdeen, Foresterhill, AB25 2ZD, Scotland, UK. E-mail: [m.zanda@abdn.ac.uk](mailto:m.zanda@abdn.ac.uk).

<sup>b</sup> Dr. G. L. Baillie, Professor Dr. R. A. Ross, Medical Sciences Building, University of Toronto, 1 King's College Circle, Toronto, Ontario, Canada. M5S 1A8.

<sup>c</sup> C.N.R.-Istituto di Chimica del Riconoscimento Molecolare, via Mancinelli 7, 20131 Milano, Italy

## I. <sup>1</sup>H, <sup>13</sup>C, <sup>19</sup>F NMR spectra

### Table of contents

| Compound          | Page |
|-------------------|------|
| Comp 1            | 2    |
| Comp 2            | 3    |
| Comp 3            | 4    |
| Comp 4            | 5    |
| Comp 5a           | 6    |
| Comp 5b           | 7    |
| Comp 5c           | 8    |
| Comp 5d           | 24   |
| Comp 6a           | 9    |
| Comp 6b           | 10   |
| Comp 6c           | 11   |
| Comp 7a           | 12   |
| Comp 7b           | 13   |
| Comp 7c           | 14   |
| Comp 8a           | 15   |
| Comp 8b           | 16   |
| Comp 8c           | 17   |
| Comp 8d           | 26   |
| Comp 8e           | 18   |
| Comp 8f           | 19   |
| Comp 8g           | 20   |
| Comp 8h           | 27   |
| Comp 8i           | 21   |
| Comp 8j           | 22   |
| Comp 8k           | 23   |
| Comp 8l           | 29   |
| Ki Tables         |      |
| Functional assays |      |



$^1\text{H}$  NMR (400 MHz,  $\text{CDCl}_3$ )

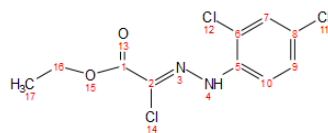

Comp 1

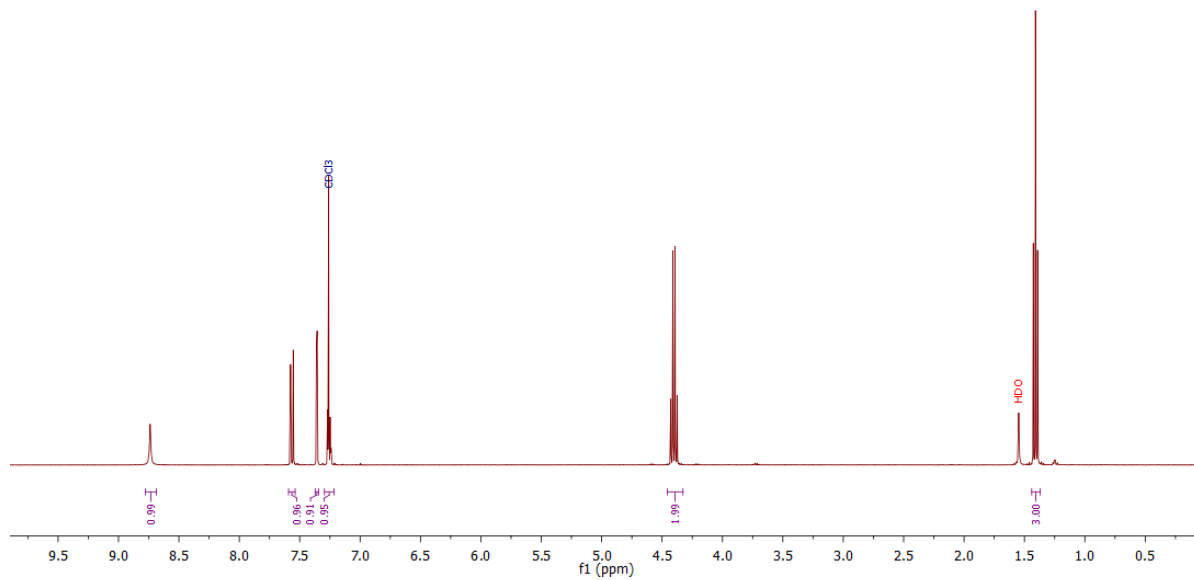

$^{13}\text{C}$  NMR (100 MHz,  $\text{CDCl}_3$ )

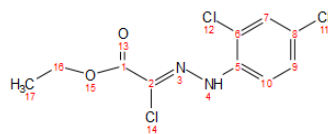

Comp 1

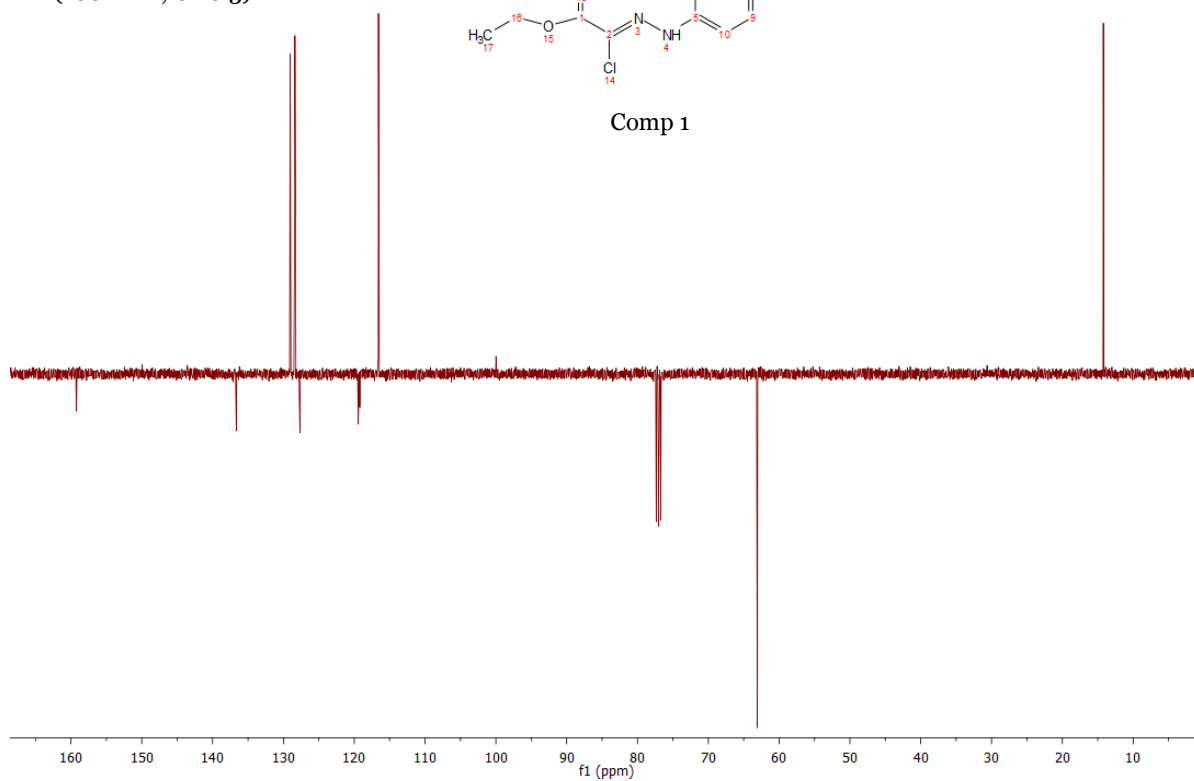

<sup>1</sup>H NMR (400 MHz, CDCl<sub>3</sub>)

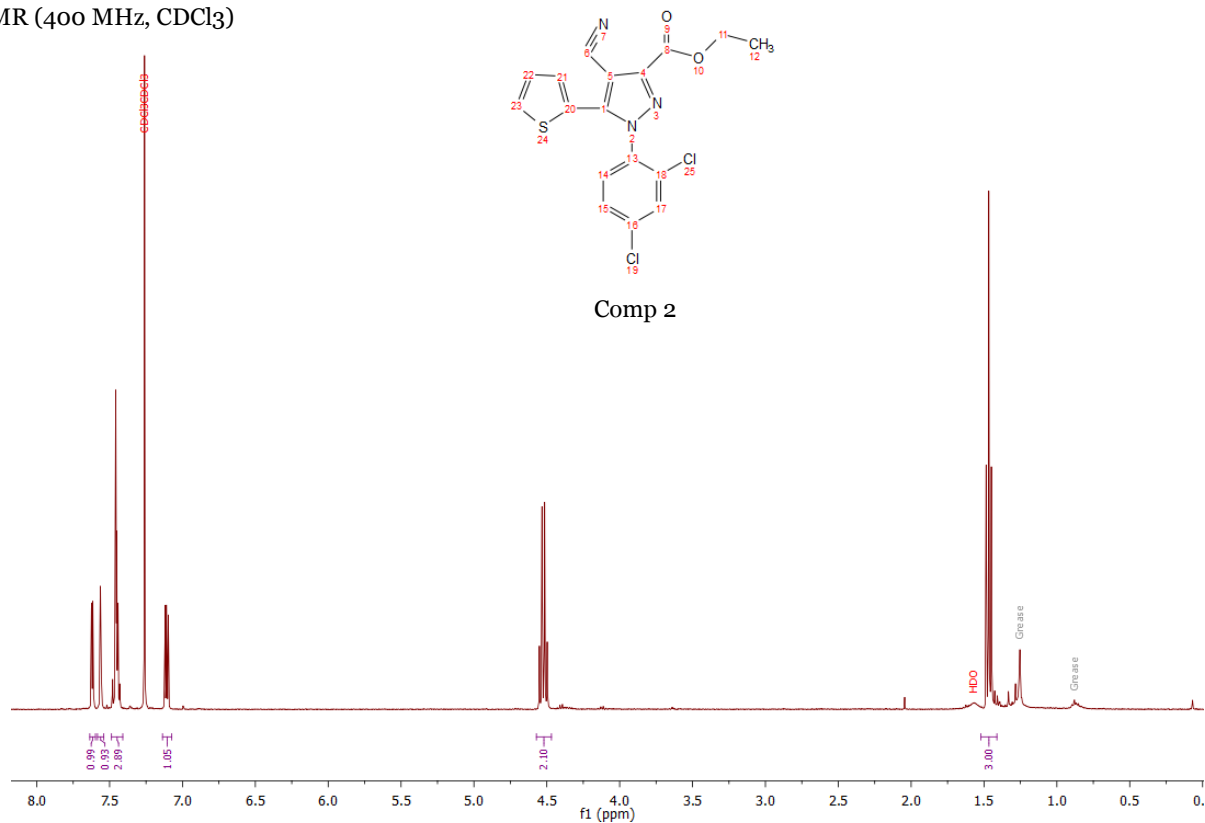

<sup>13</sup>C NMR (100 MHz, CDCl<sub>3</sub>)

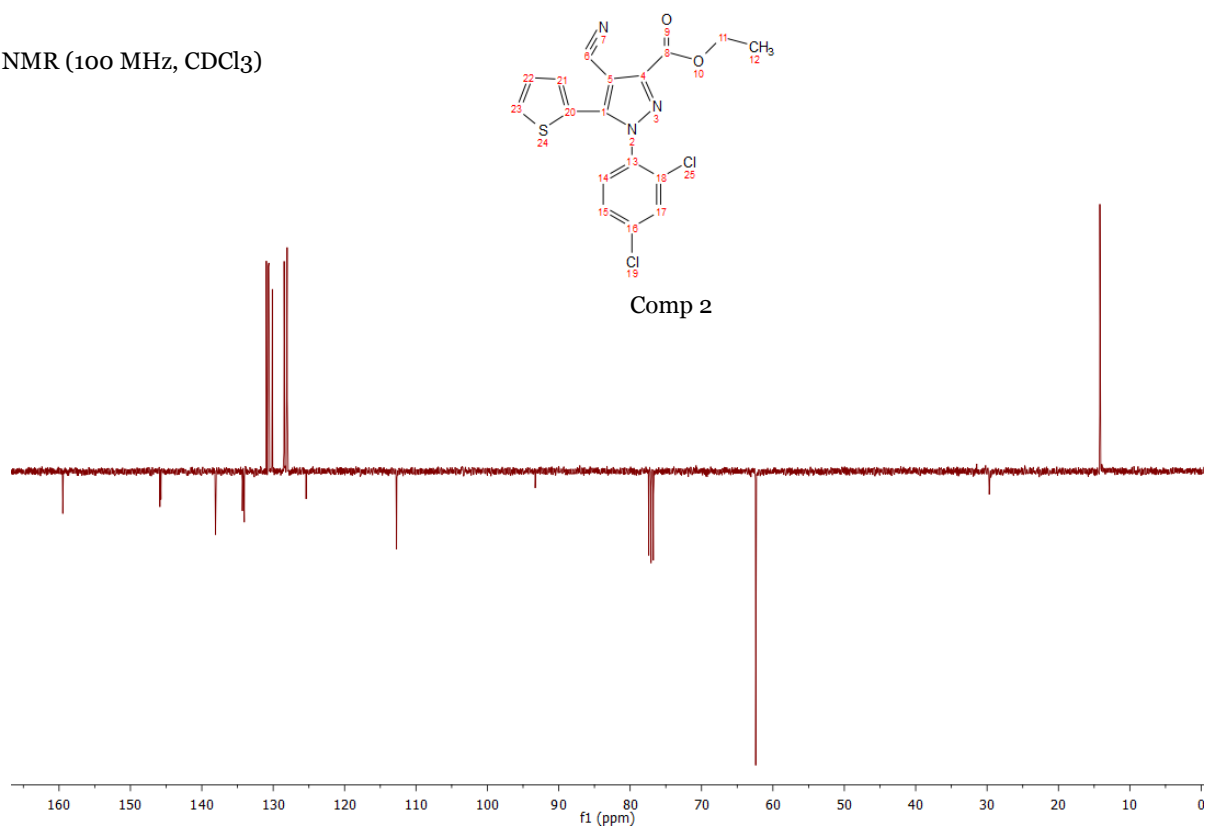

$^1\text{H}$  NMR (400 MHz,  $\text{CDCl}_3$ )

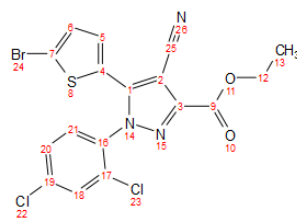

Comp 3

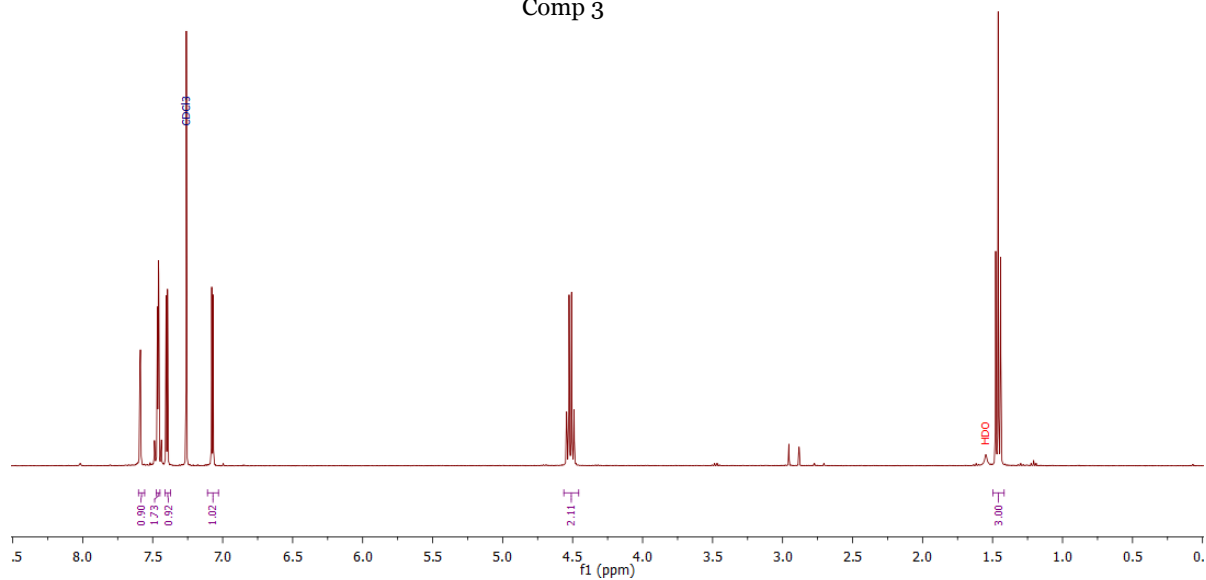

$^{13}\text{C}$  NMR (100 MHz, DMSO)

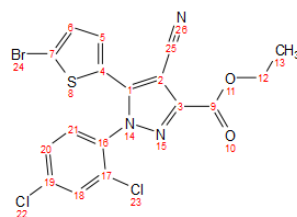

Comp 3

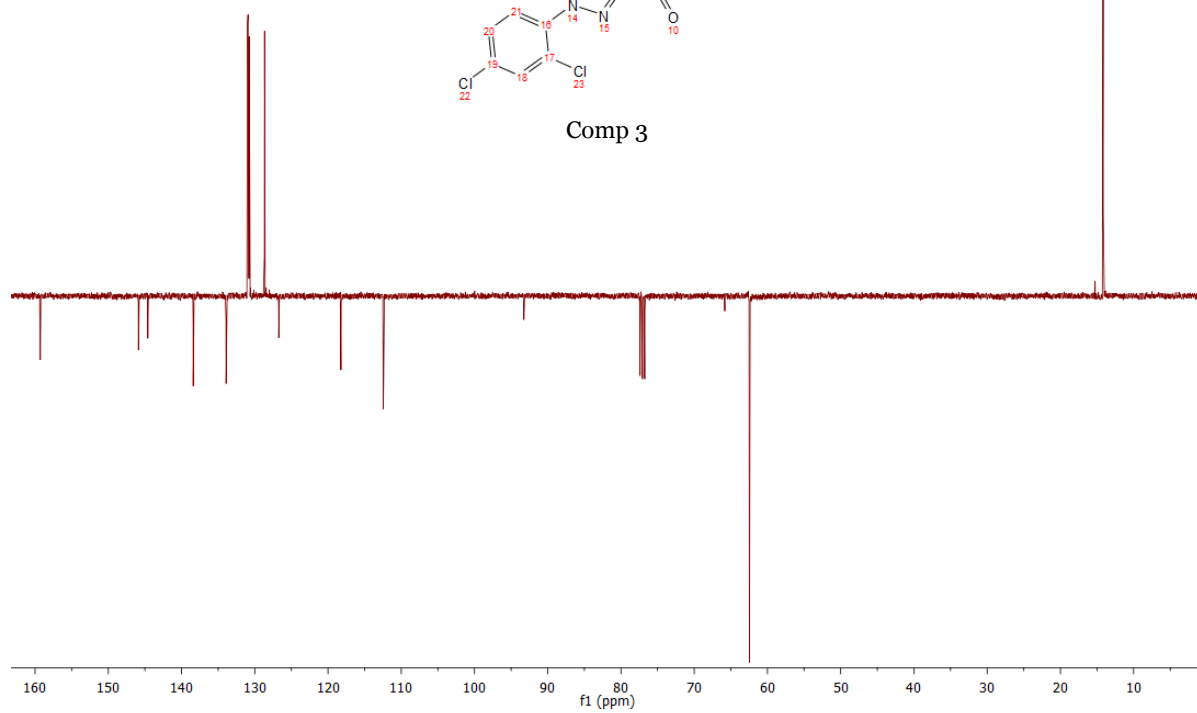

<sup>1</sup>H NMR (400 MHz, CDCl<sub>3</sub>)

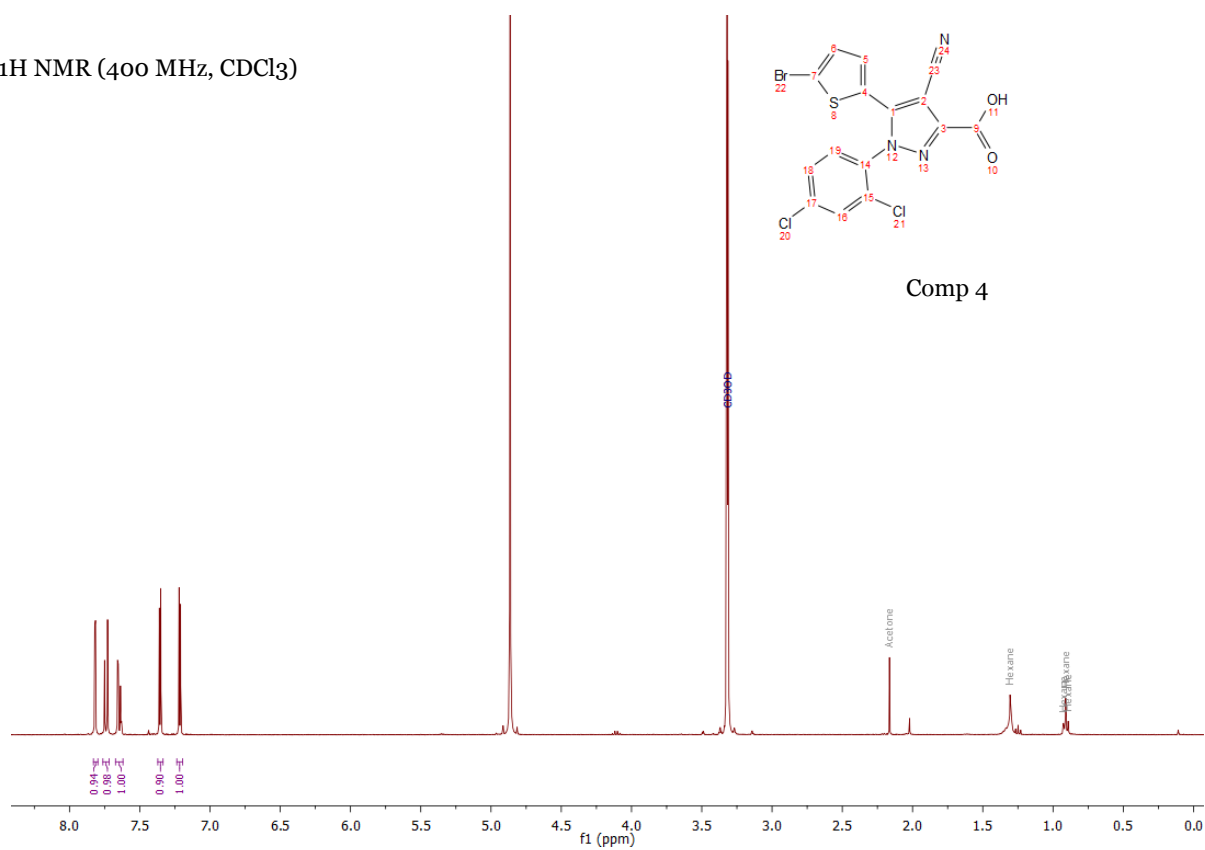

<sup>13</sup>C NMR (100 MHz, CDCl<sub>3</sub>)

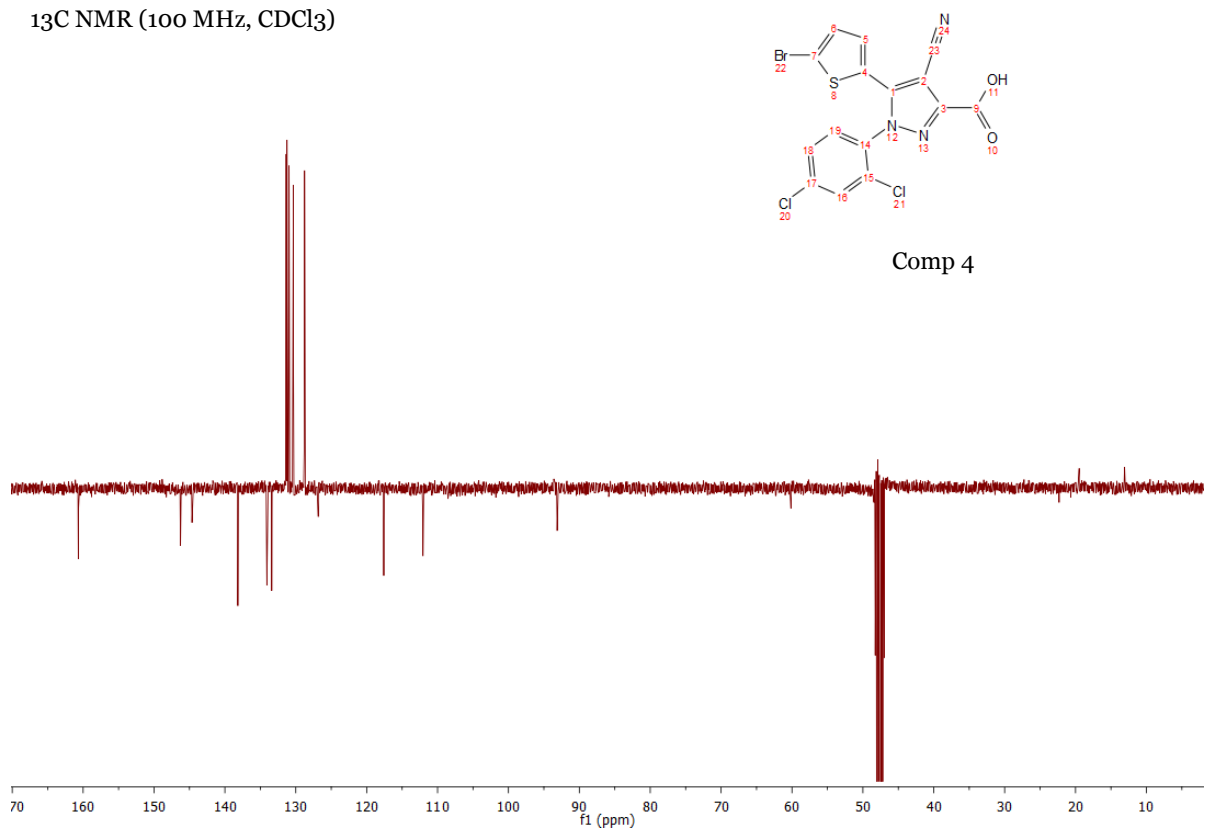

<sup>1</sup>H NMR (400 MHz, CDCl<sub>3</sub>)

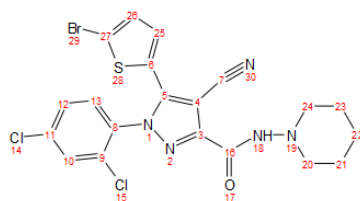

Comp 5a

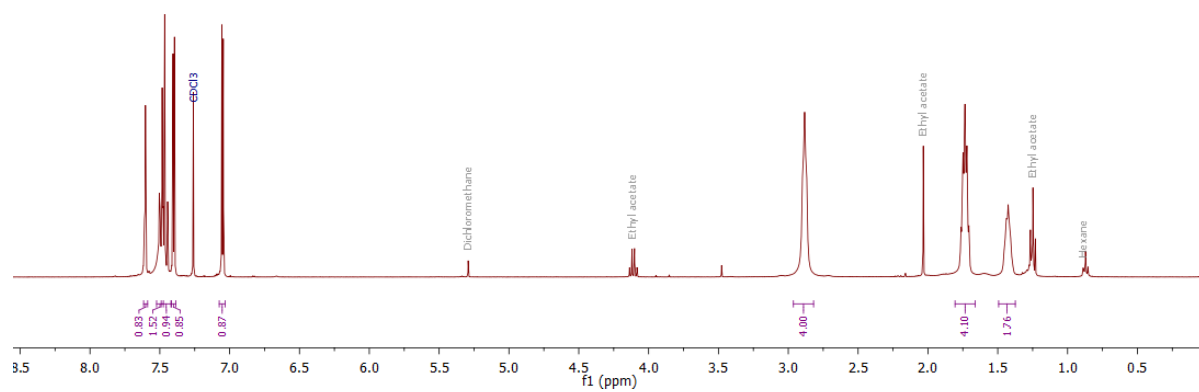

<sup>13</sup>C NMR (100 MHz, CDCl<sub>3</sub>)

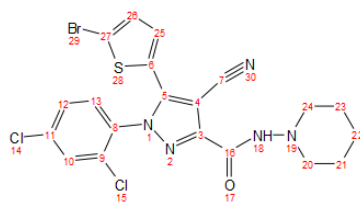

Comp 5a

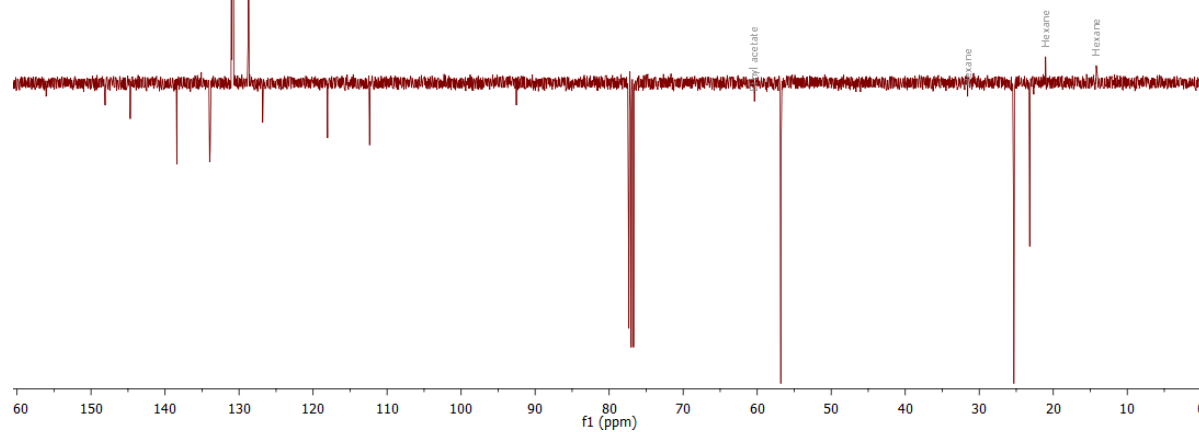

$^1\text{H}$  NMR (400 MHz,  $\text{CDCl}_3$ )

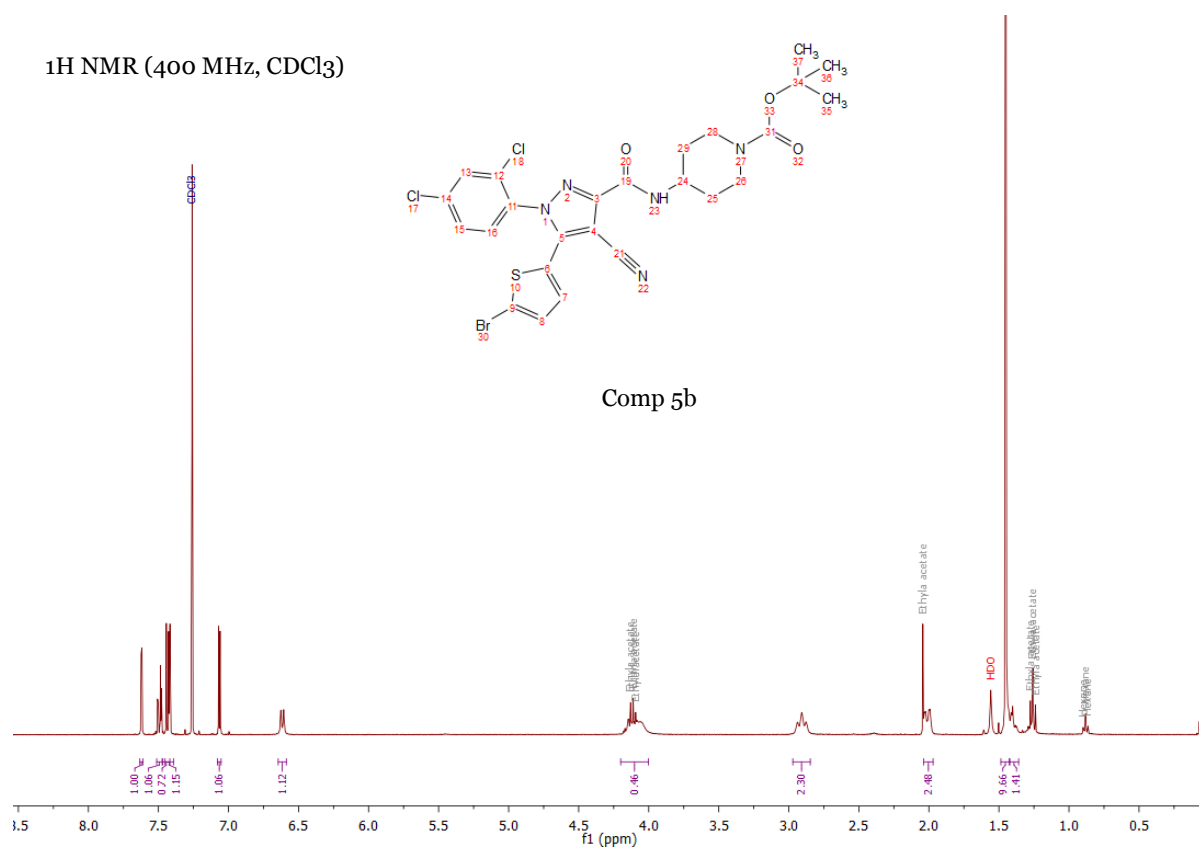

$^{13}\text{C}$  NMR (100 MHz,  $\text{CDCl}_3$ )

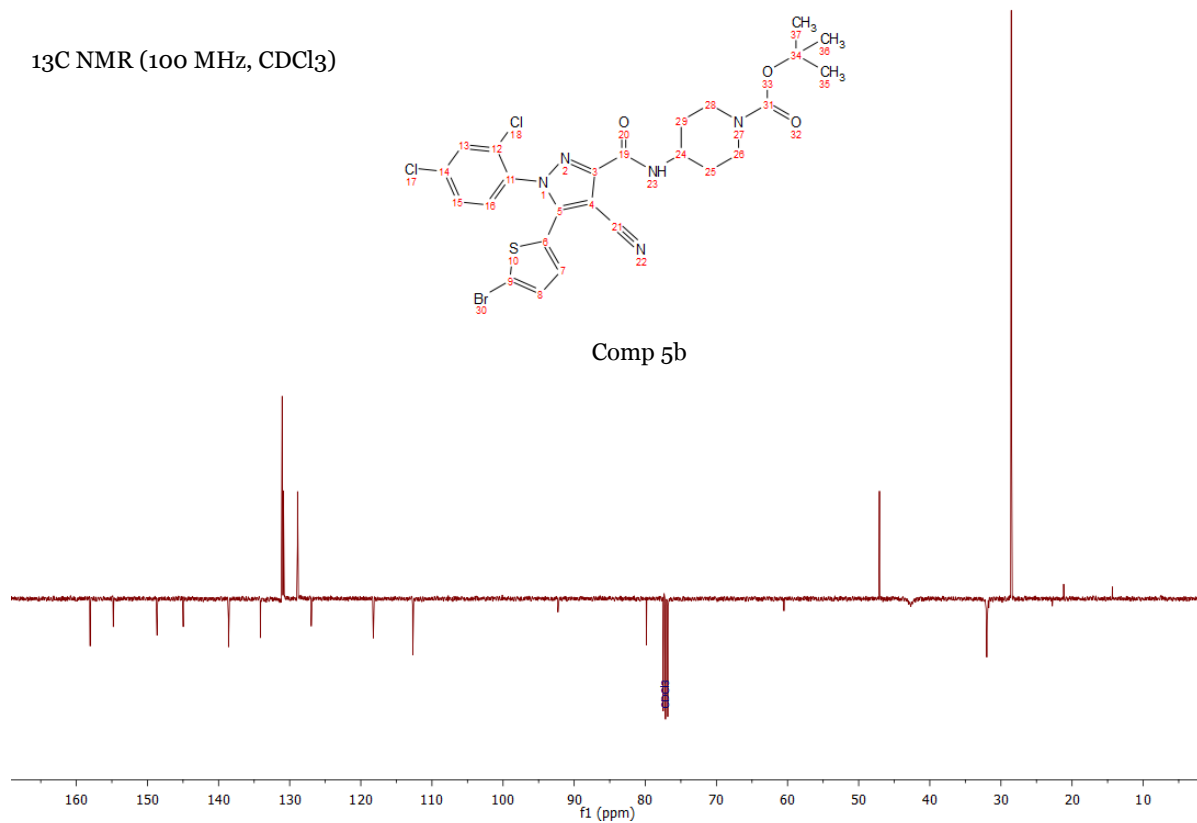



<sup>1</sup>H NMR (400 MHz, CDCl<sub>3</sub>)

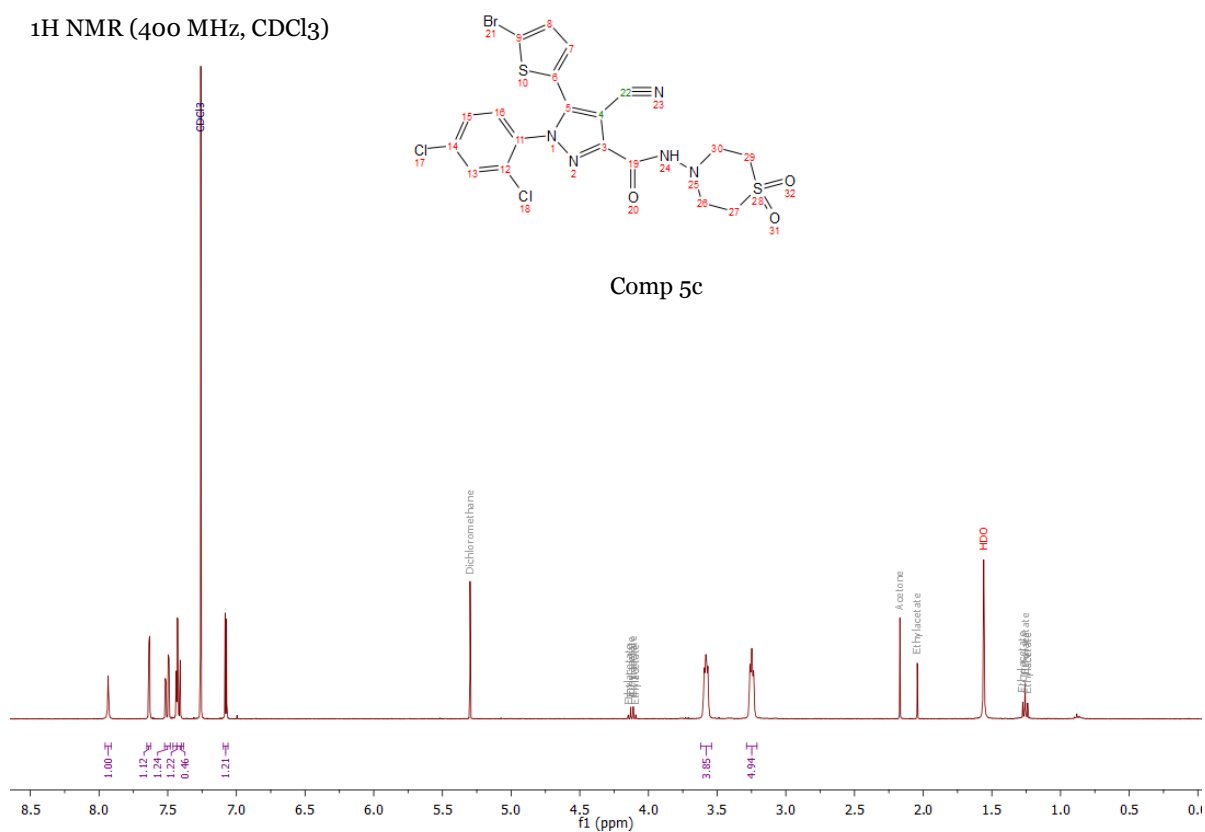

<sup>13</sup>C NMR (100 MHz, CDCl<sub>3</sub>)

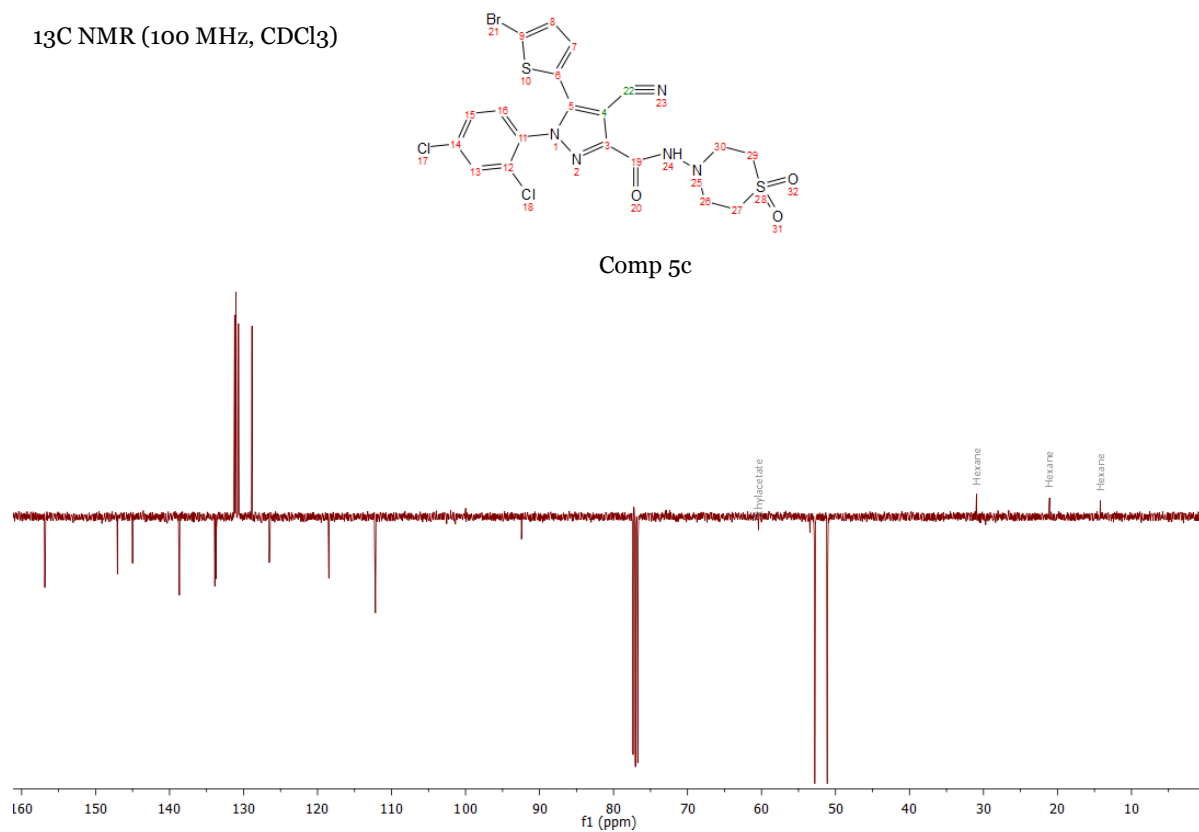

$^1\text{H}$  NMR (400 MHz,  $\text{CDCl}_3$ )

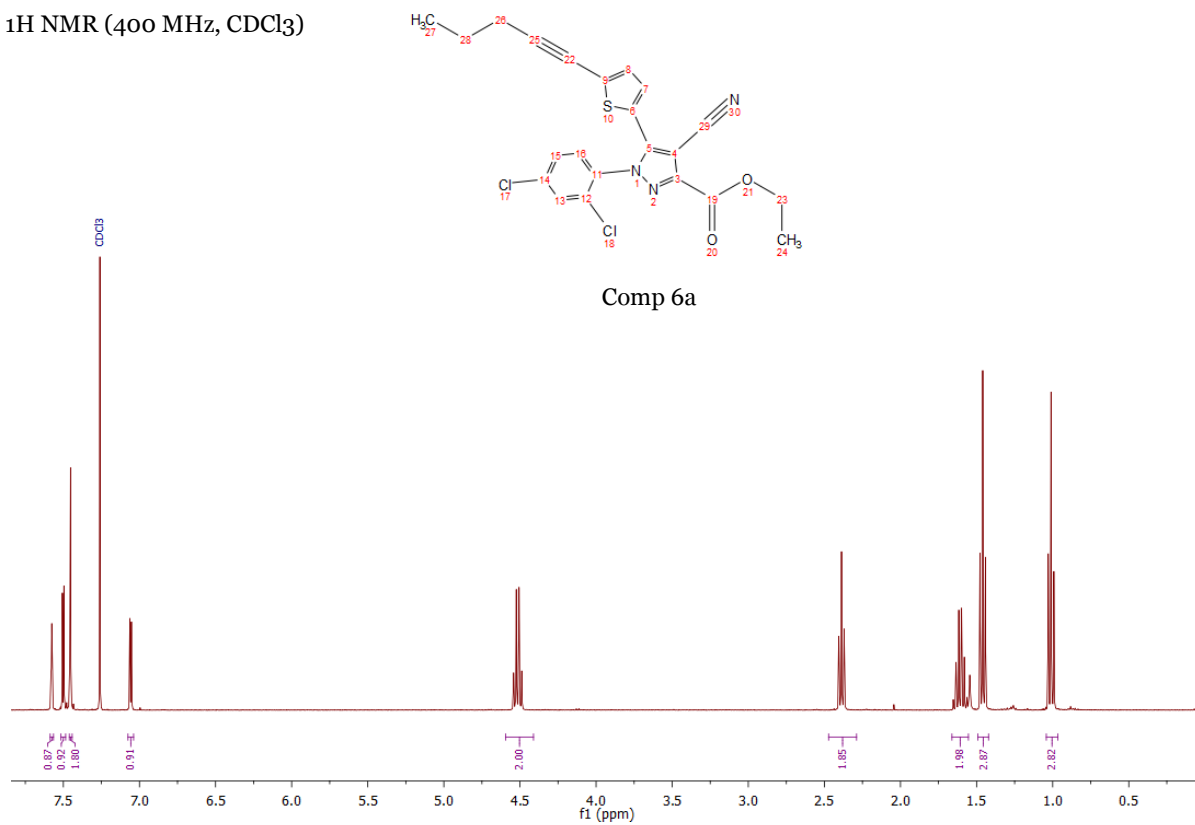

$^{13}\text{C}$  NMR (100 MHz,  $\text{CDCl}_3$ )

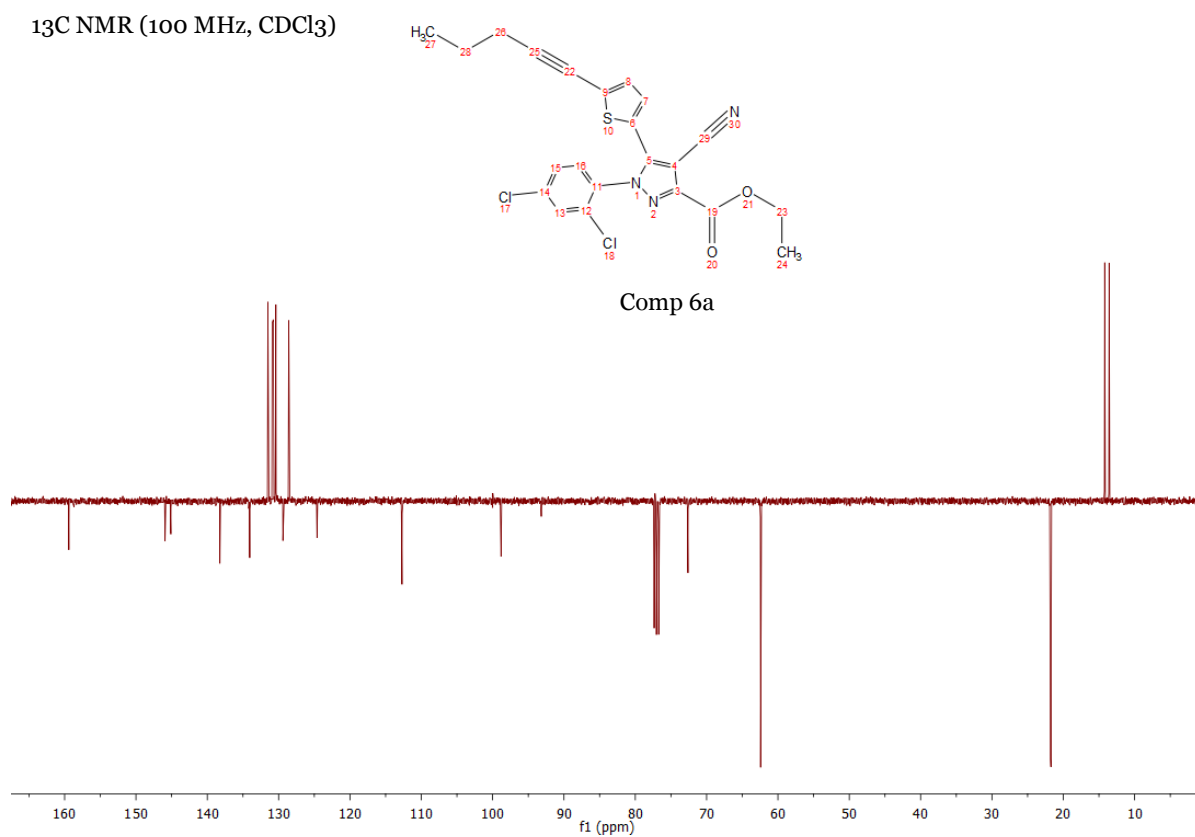

$^1\text{H}$  NMR (400 MHz,  $\text{CDCl}_3$ )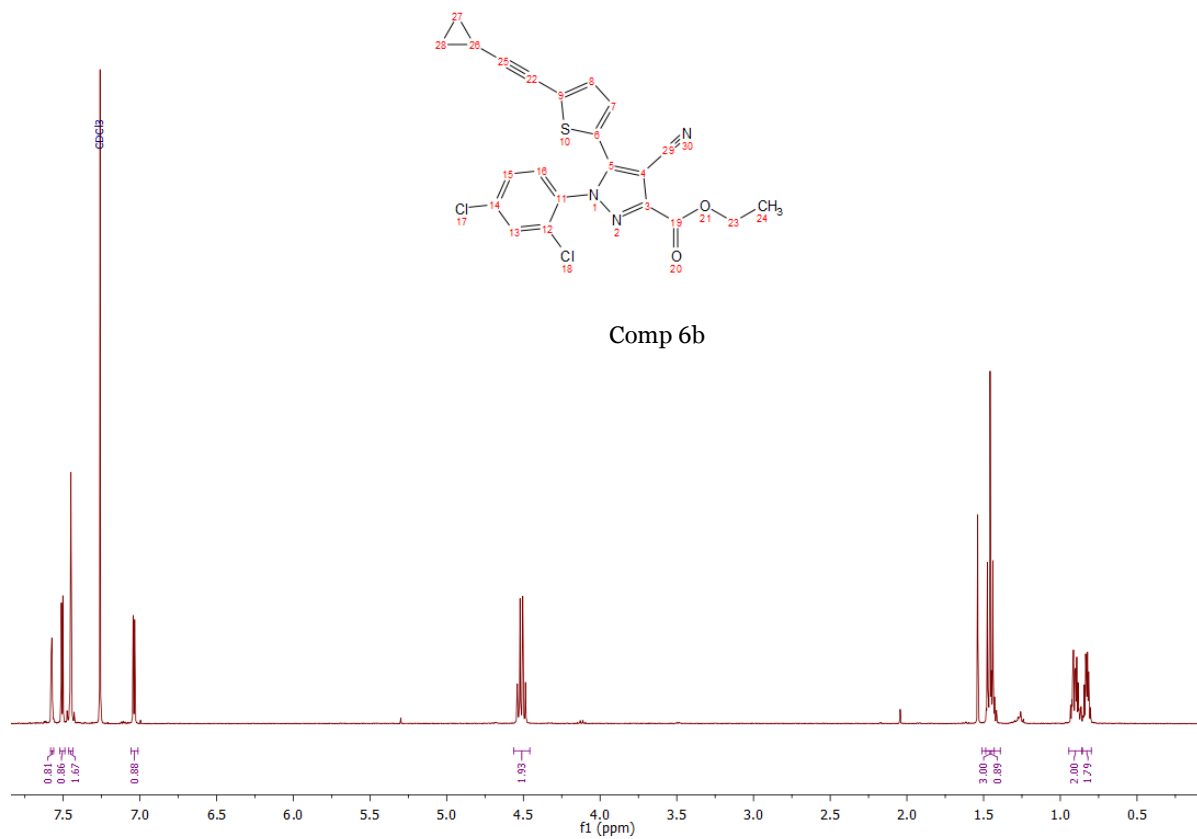 $^{13}\text{C}$  NMR (100 MHz,  $\text{CDCl}_3$ )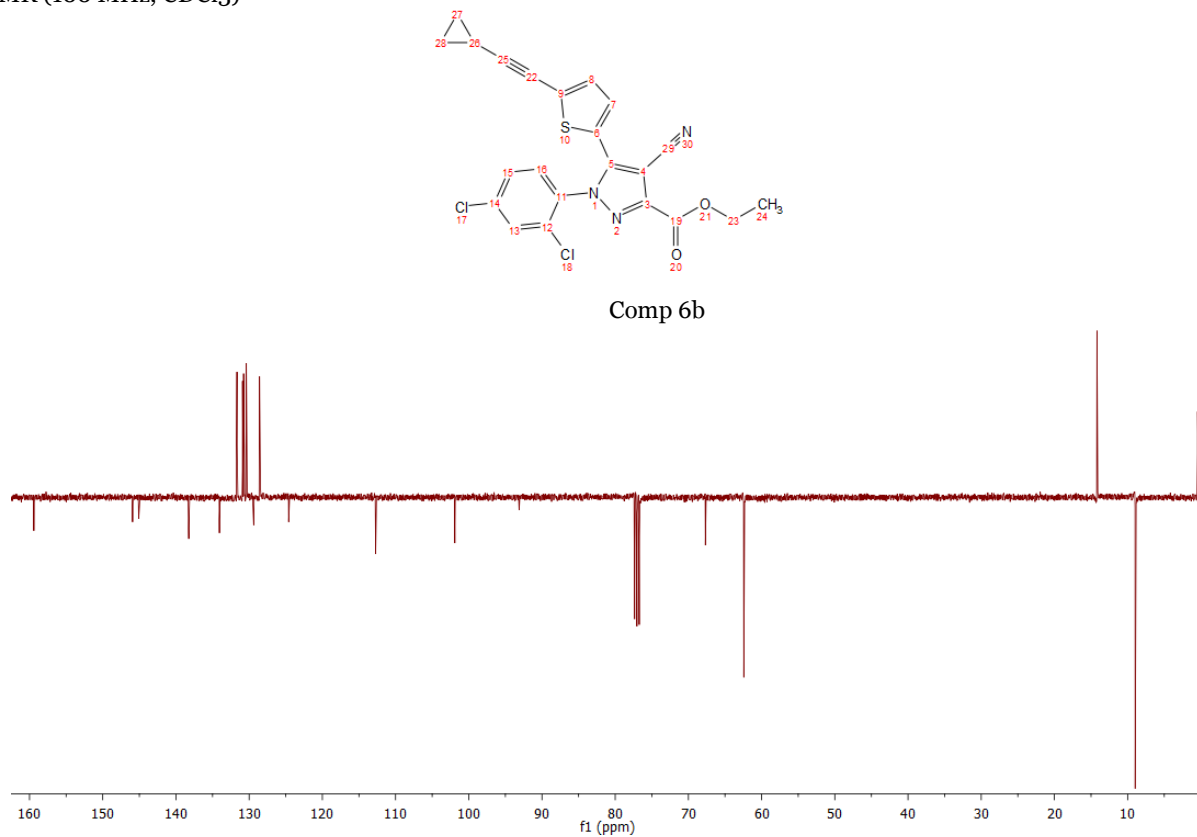

$^1\text{H}$  NMR (400 MHz,  $\text{CDCl}_3$ )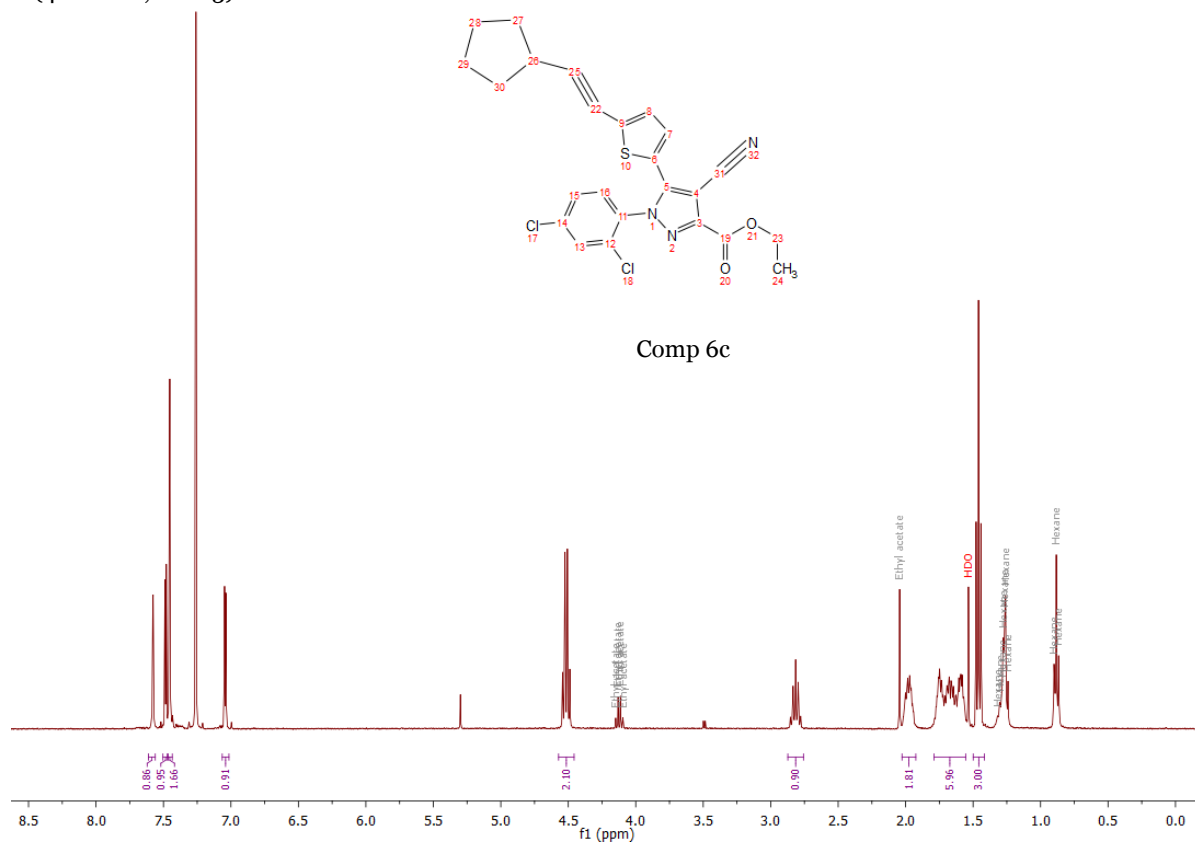 $^{13}\text{C}$  NMR (100 MHz,  $\text{CDCl}_3$ )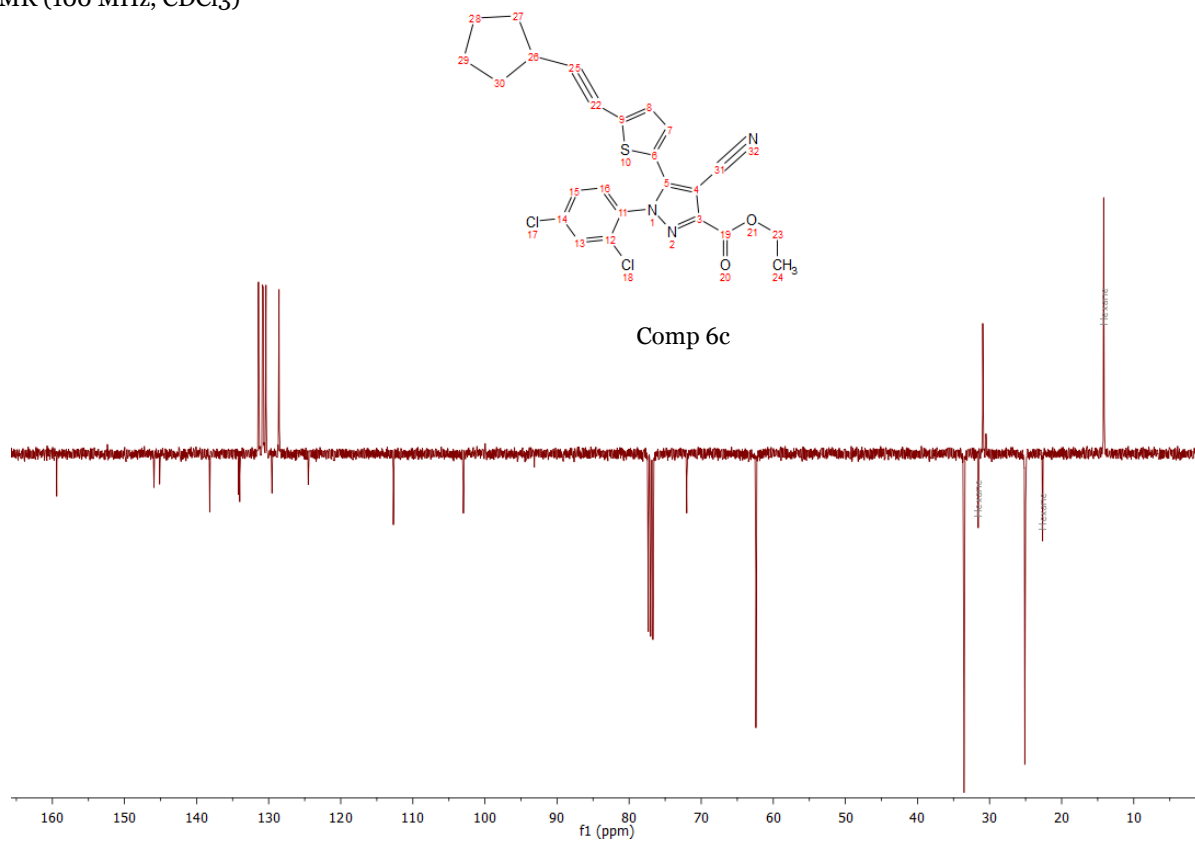

$^1\text{H}$  NMR (400 MHz,  $\text{CDCl}_3$ )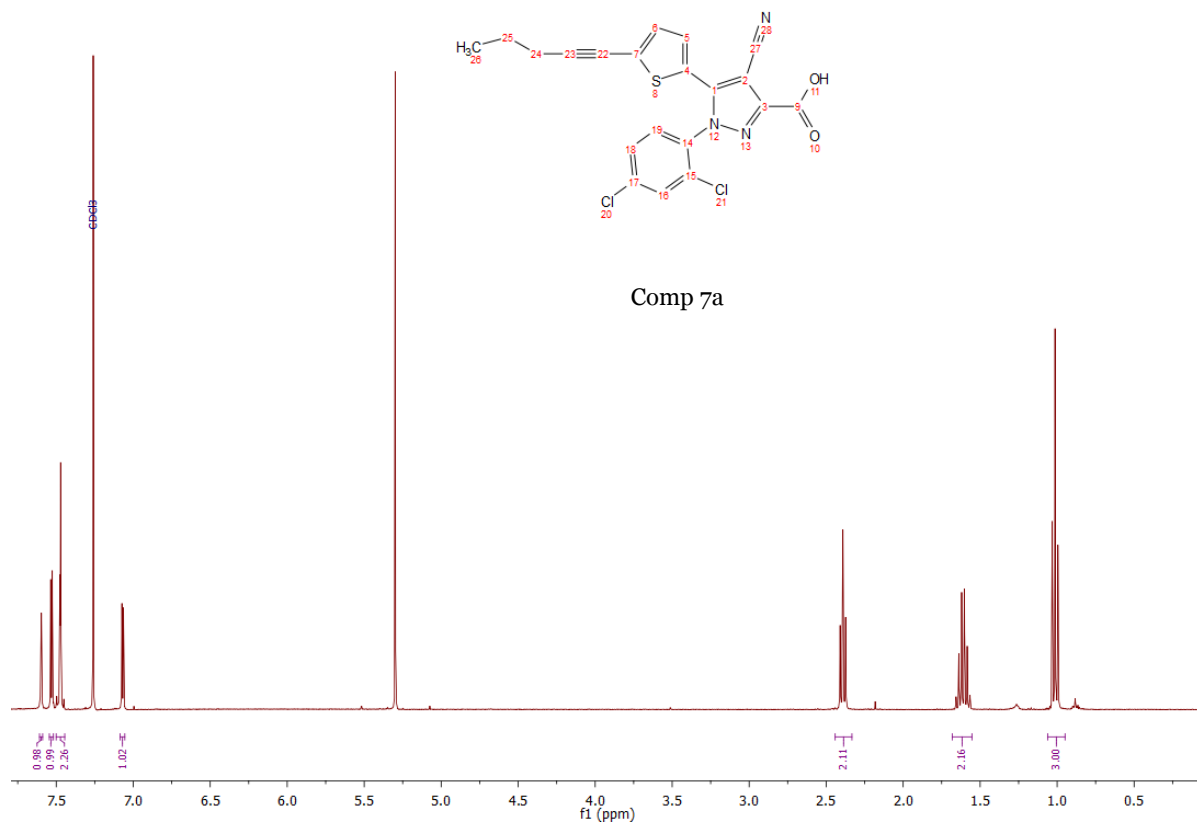 $^{13}\text{C}$  NMR (100 MHz,  $\text{CDCl}_3$ )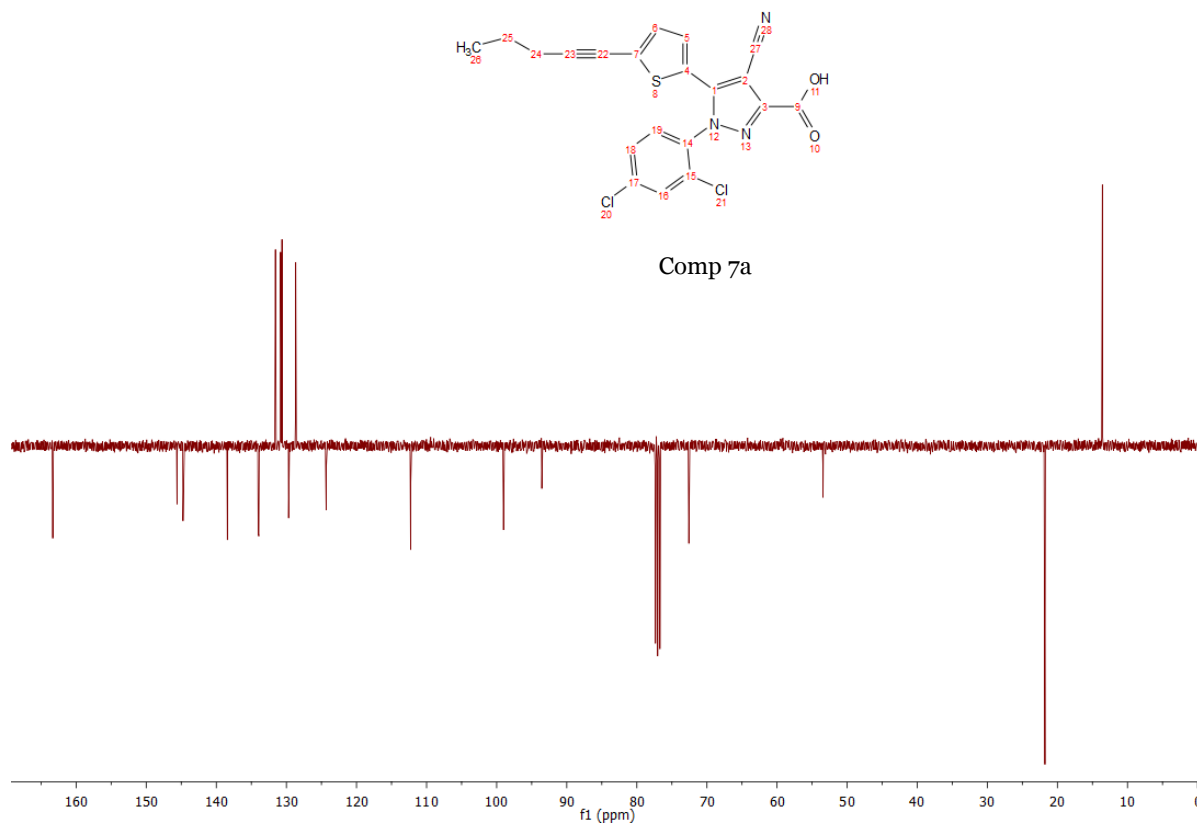

$^1\text{H}$  NMR (400 MHz, DMSO)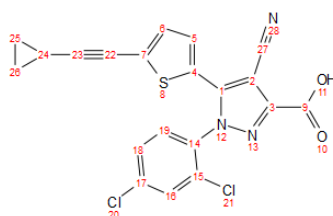

Comp 7b

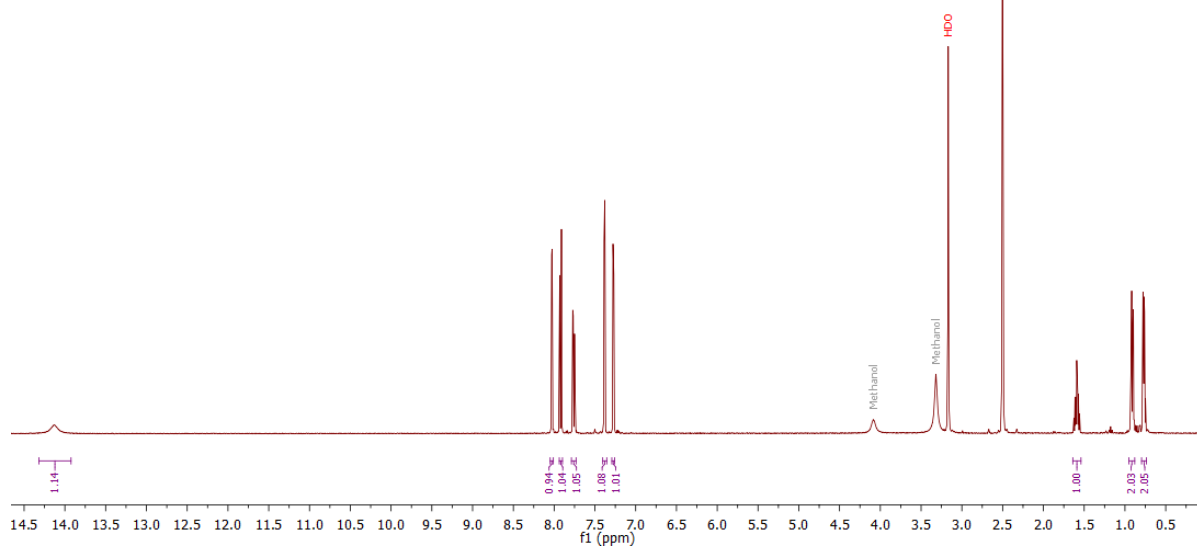 $^{13}\text{C}$  NMR (100 MHz, DMSO)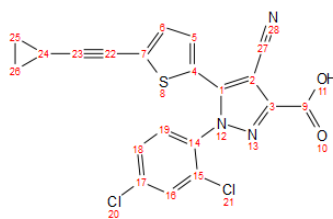

Comp 7b

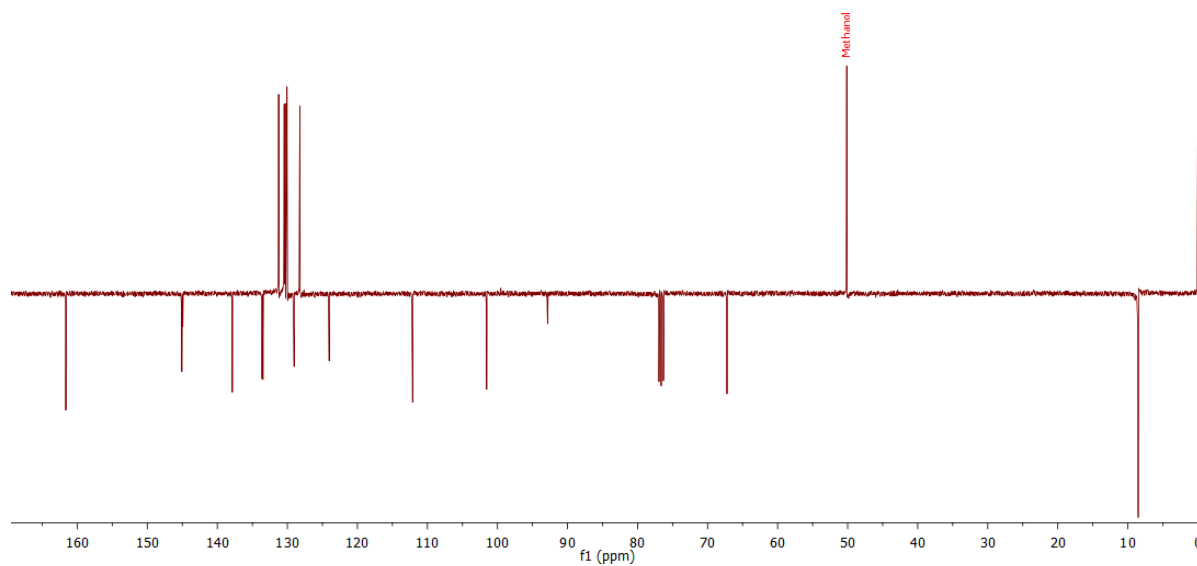

$^1\text{H}$  NMR (400 MHz,  $\text{CDCl}_3$ )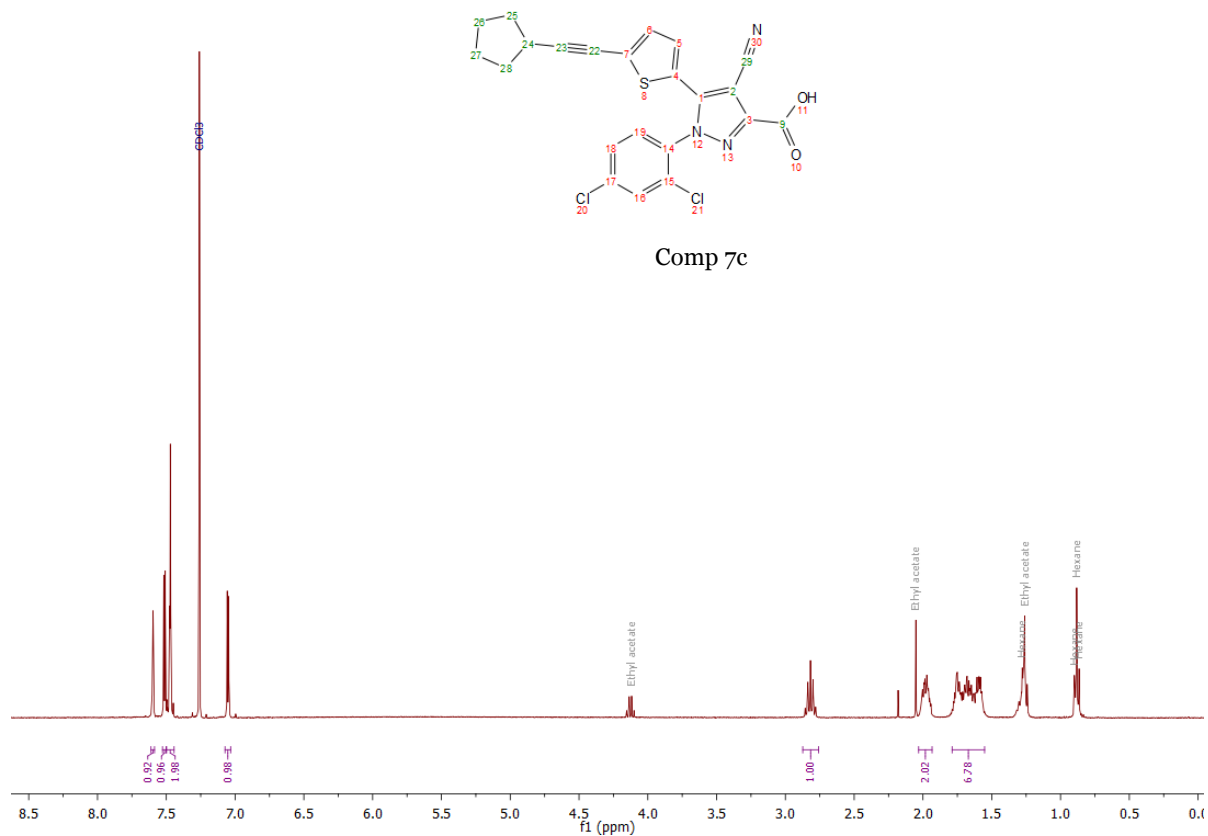 $^{13}\text{C}$  NMR (100 MHz,  $\text{CDCl}_3$ )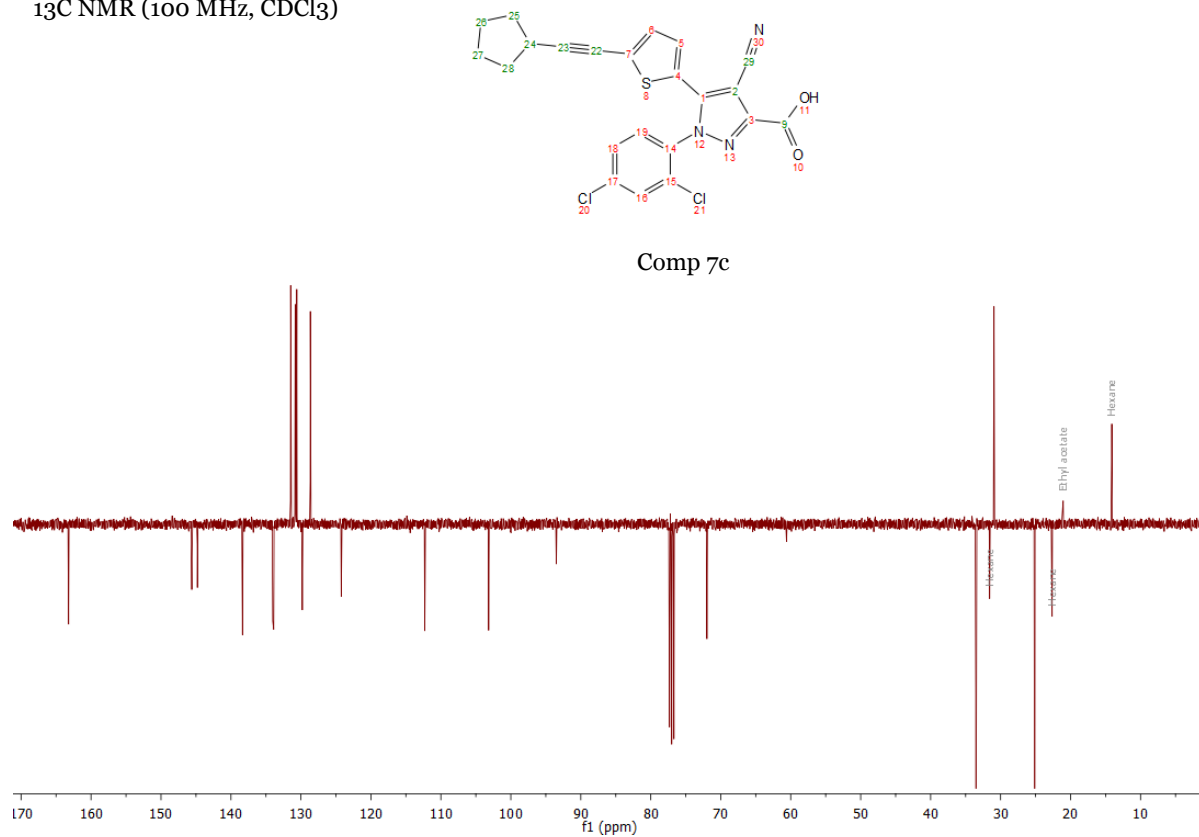

$^1\text{H}$  NMR (400 MHz,  $\text{CDCl}_3$ )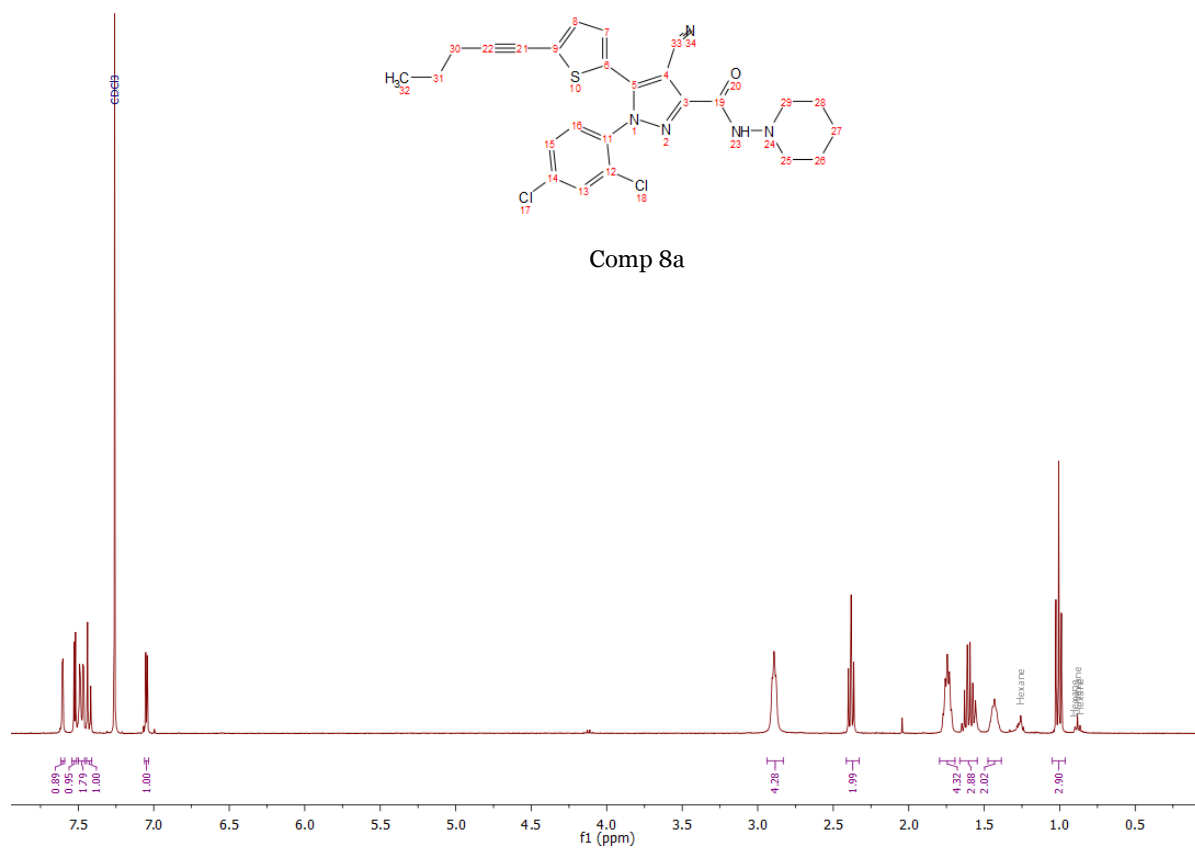 $^{13}\text{C}$  NMR (100 MHz,  $\text{CDCl}_3$ )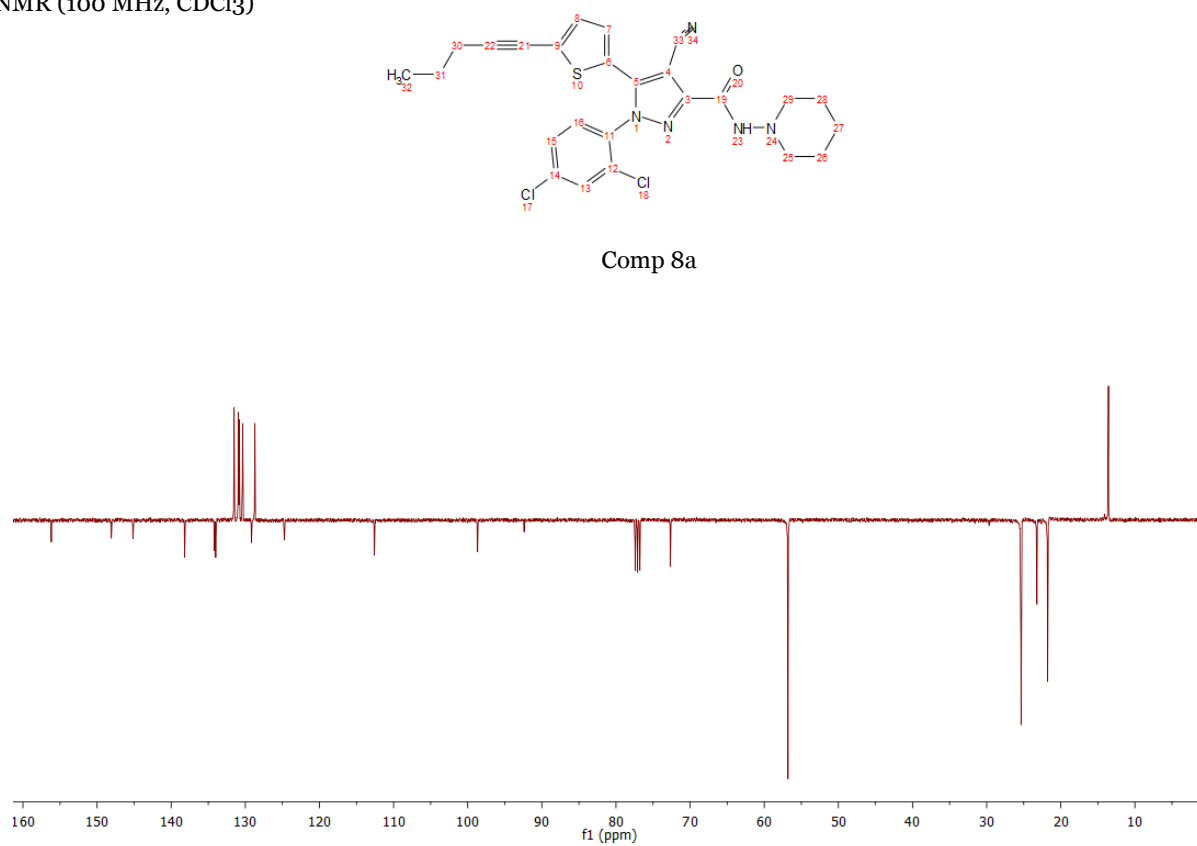



<sup>1</sup>H NMR (400 MHz, CDCl<sub>3</sub>)

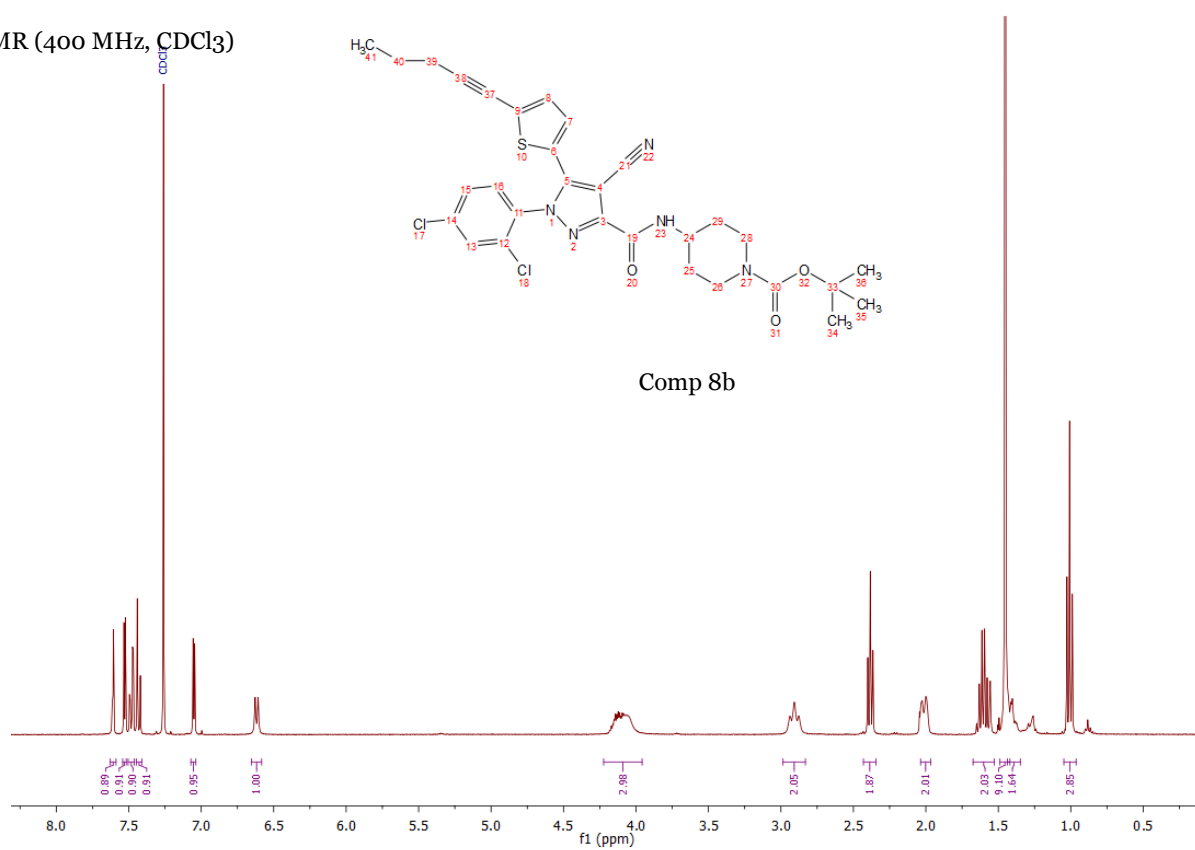

<sup>13</sup>C NMR (100 MHz, CDCl<sub>3</sub>)

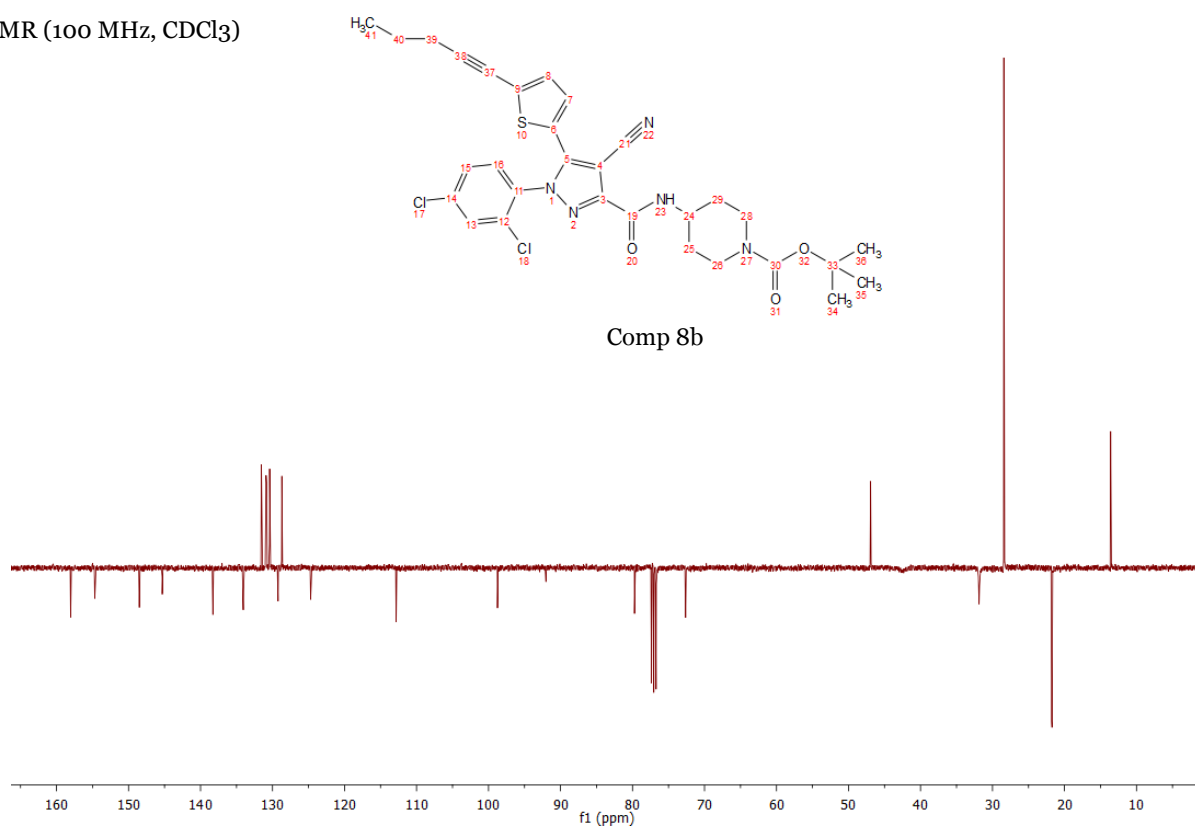

$^1\text{H}$  NMR (400 MHz,  $\text{CDCl}_3$ )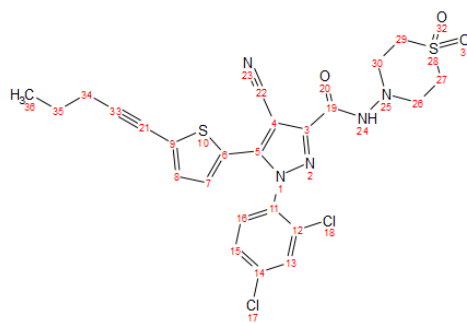

Comp 8c

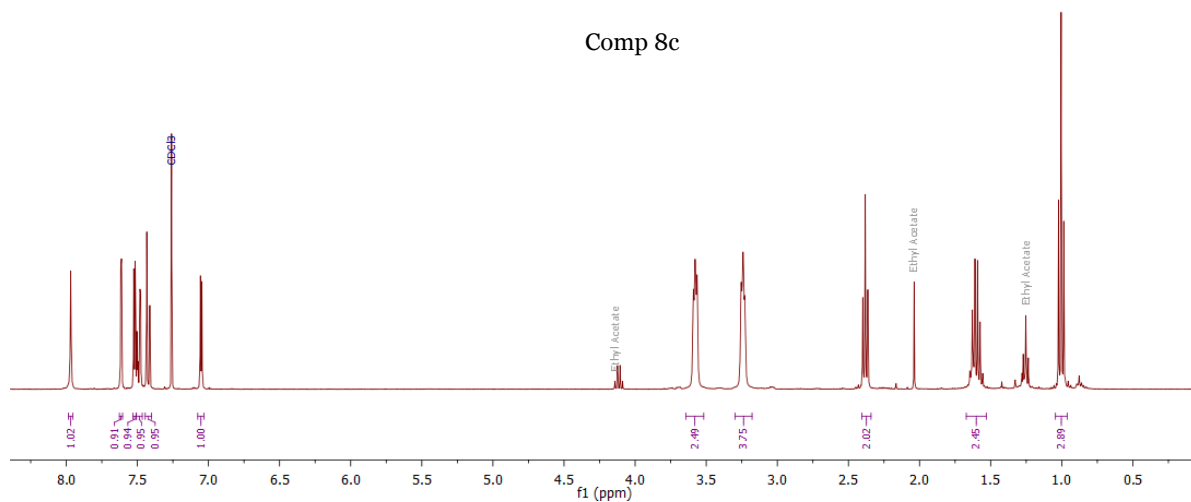 $^{13}\text{C}$  NMR (100 MHz,  $\text{CDCl}_3$ )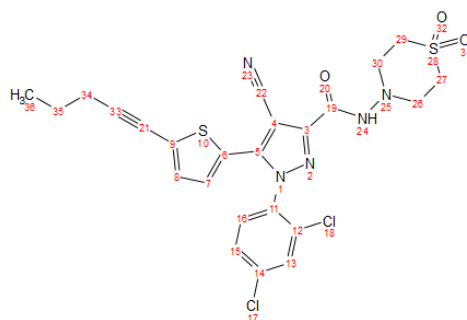

Comp 8c

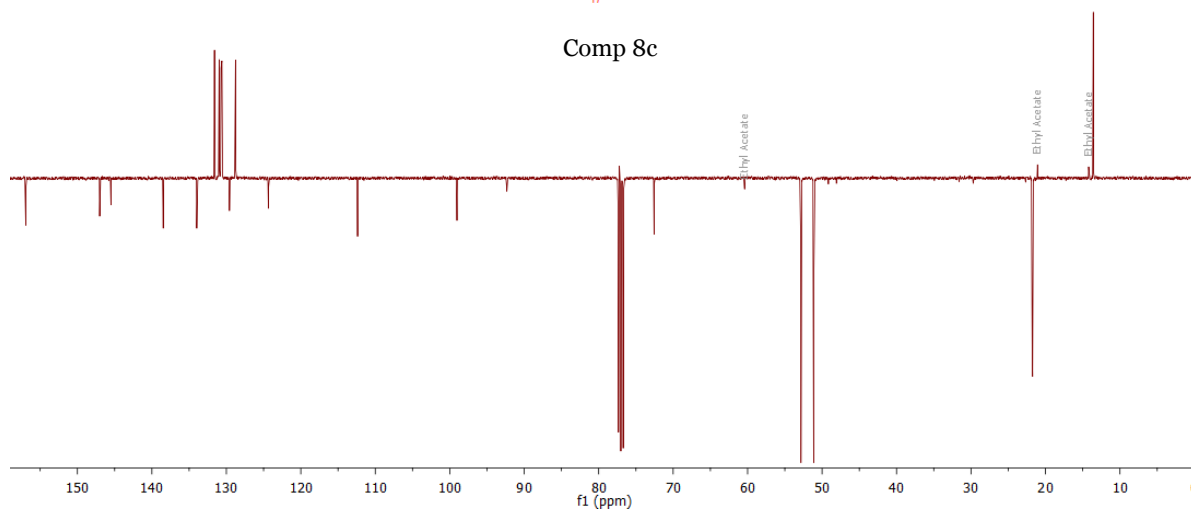

$^1\text{H}$  NMR (400 MHz,  $\text{CDCl}_3$ )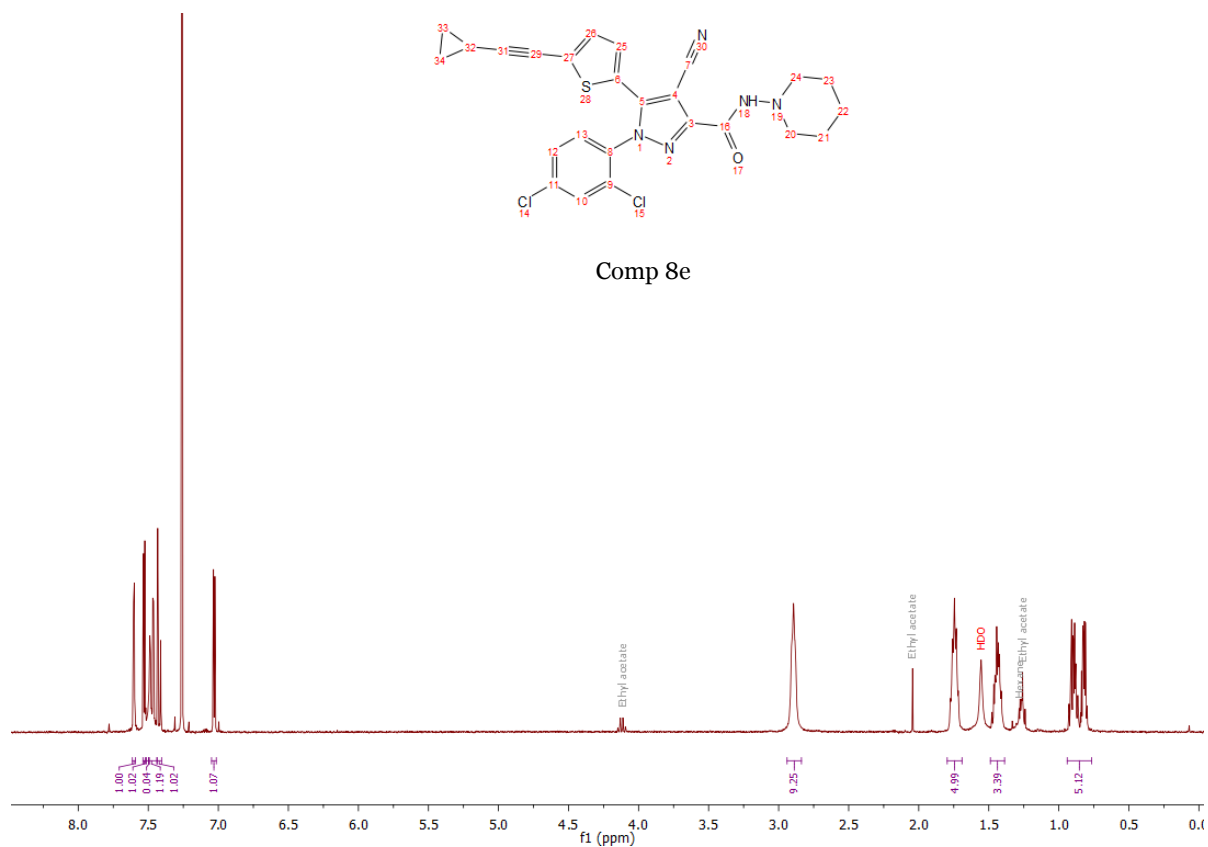 $^{13}\text{C}$  NMR (100 MHz,  $\text{CDCl}_3$ )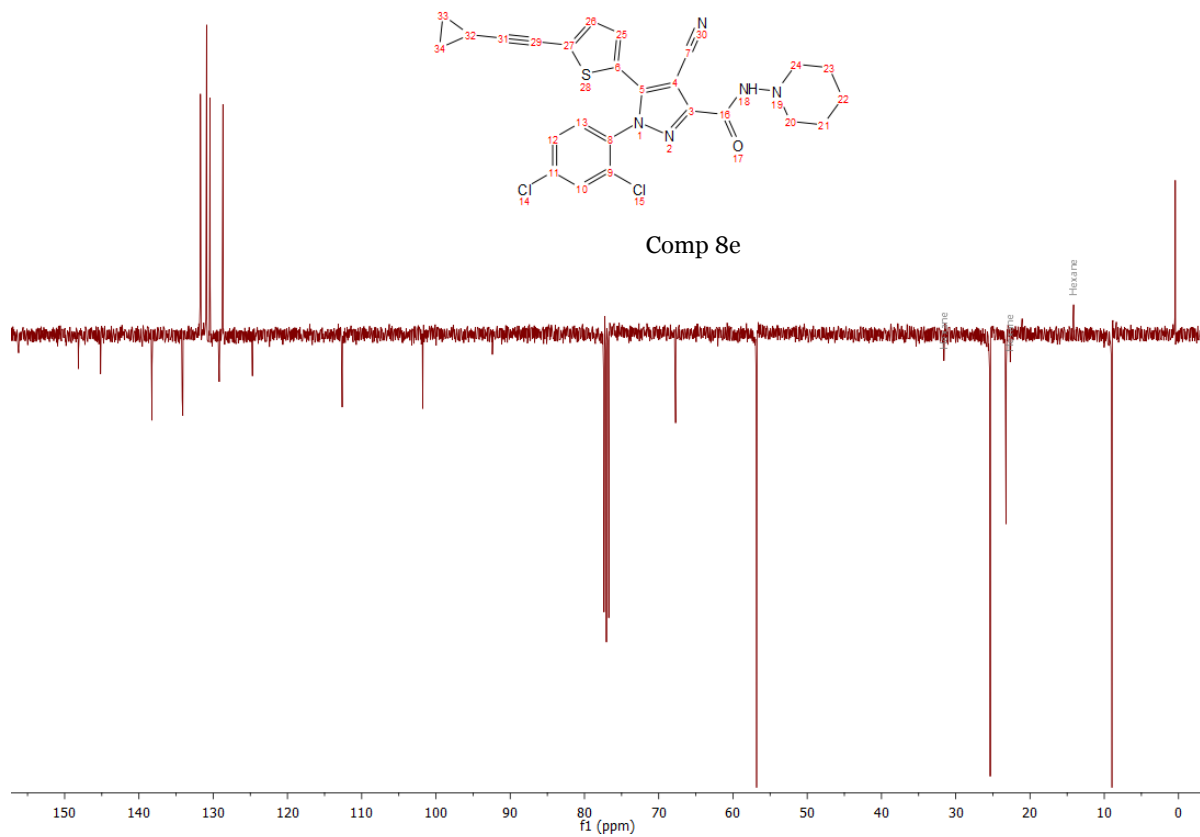

$^1\text{H}$  NMR (400 MHz,  $\text{CDCl}_3$ )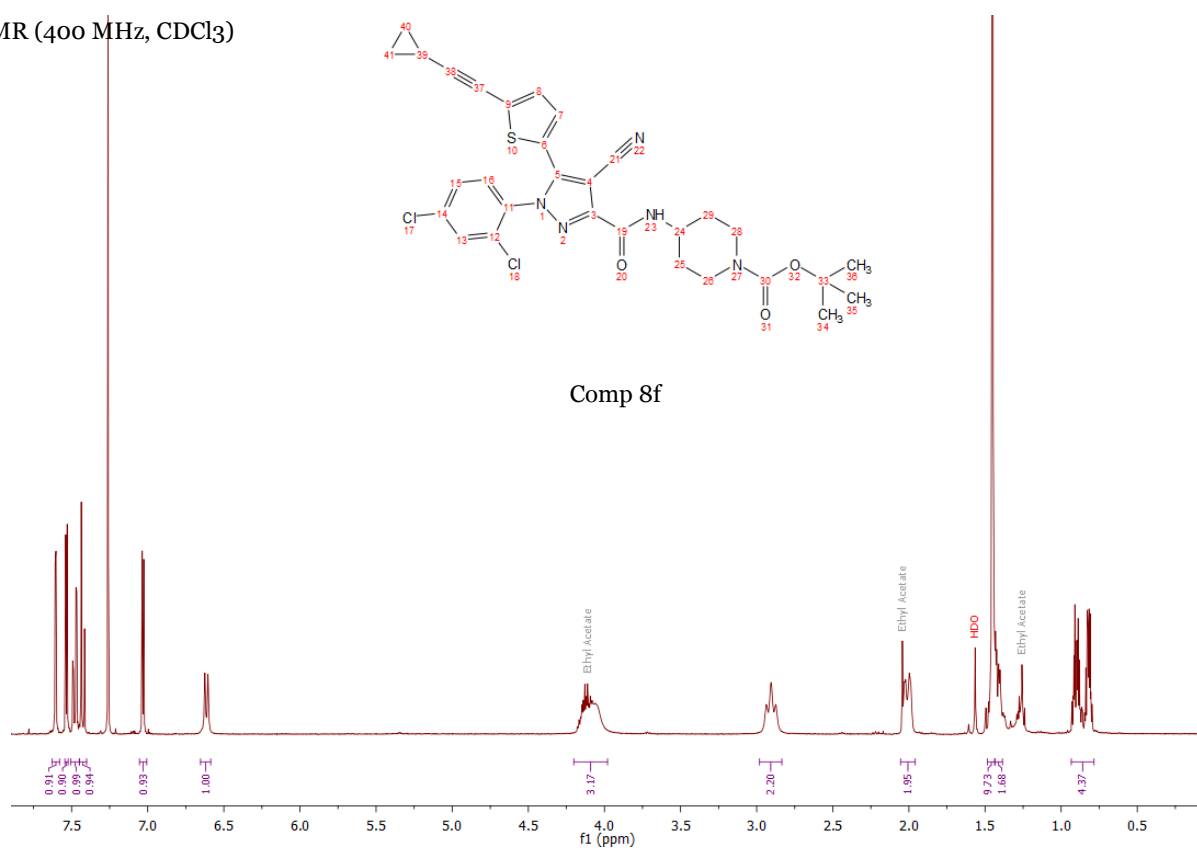 $^{13}\text{C}$  NMR (100 MHz,  $\text{CDCl}_3$ )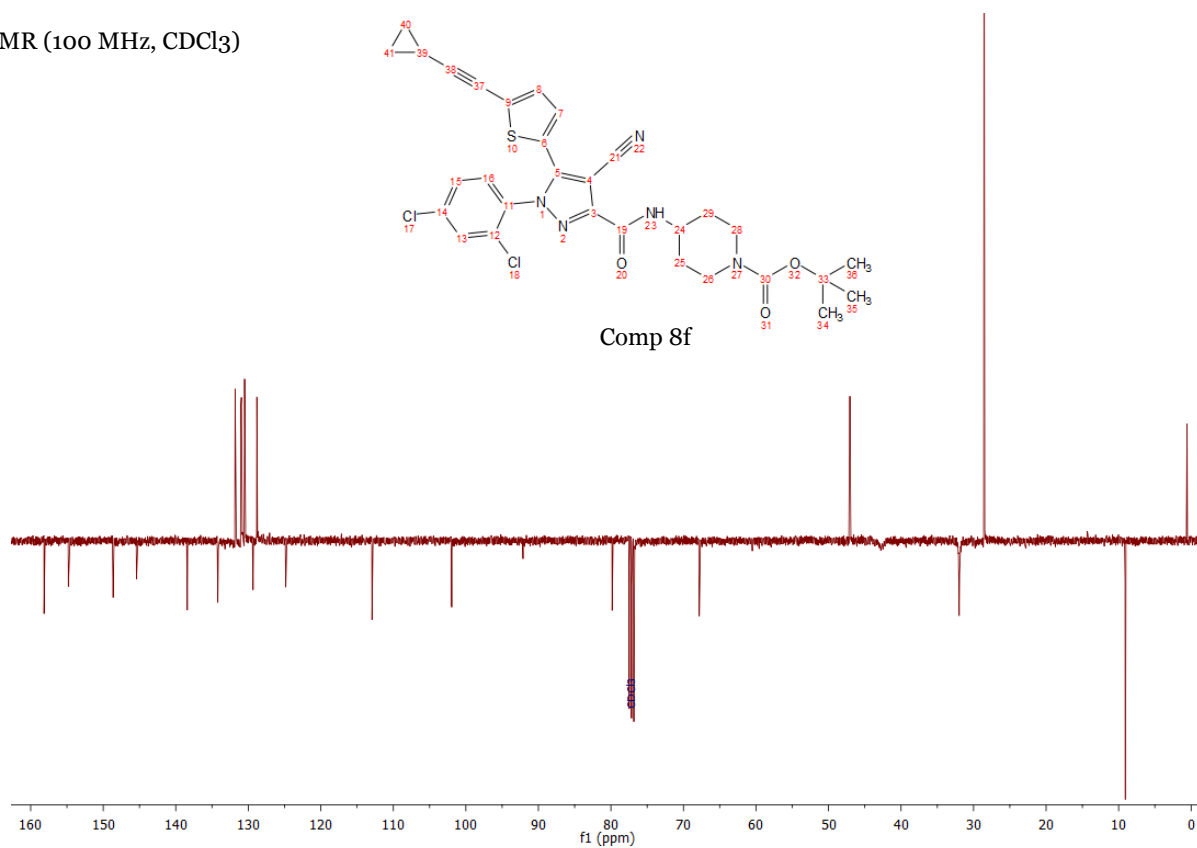

<sup>1</sup>H NMR (400 MHz, CDCl<sub>3</sub>)

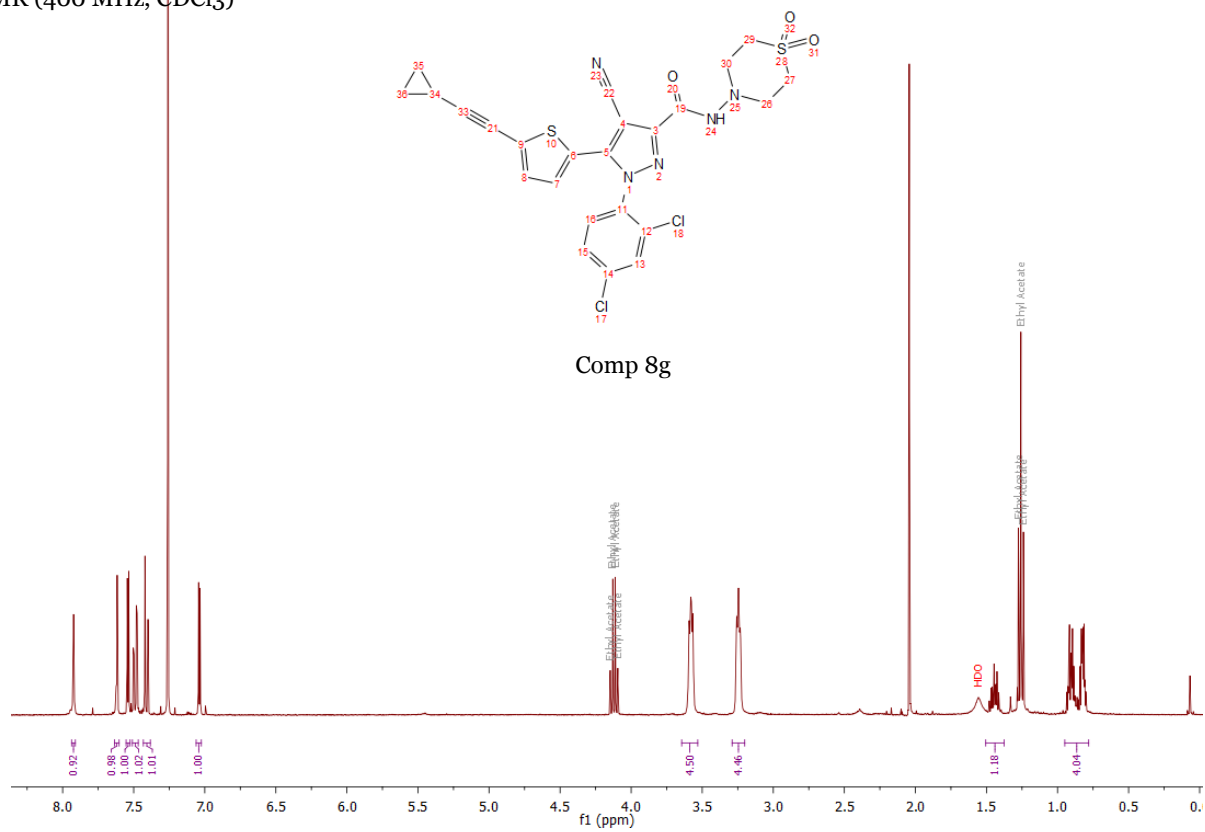

<sup>13</sup>C NMR (100 MHz, CDCl<sub>3</sub>)

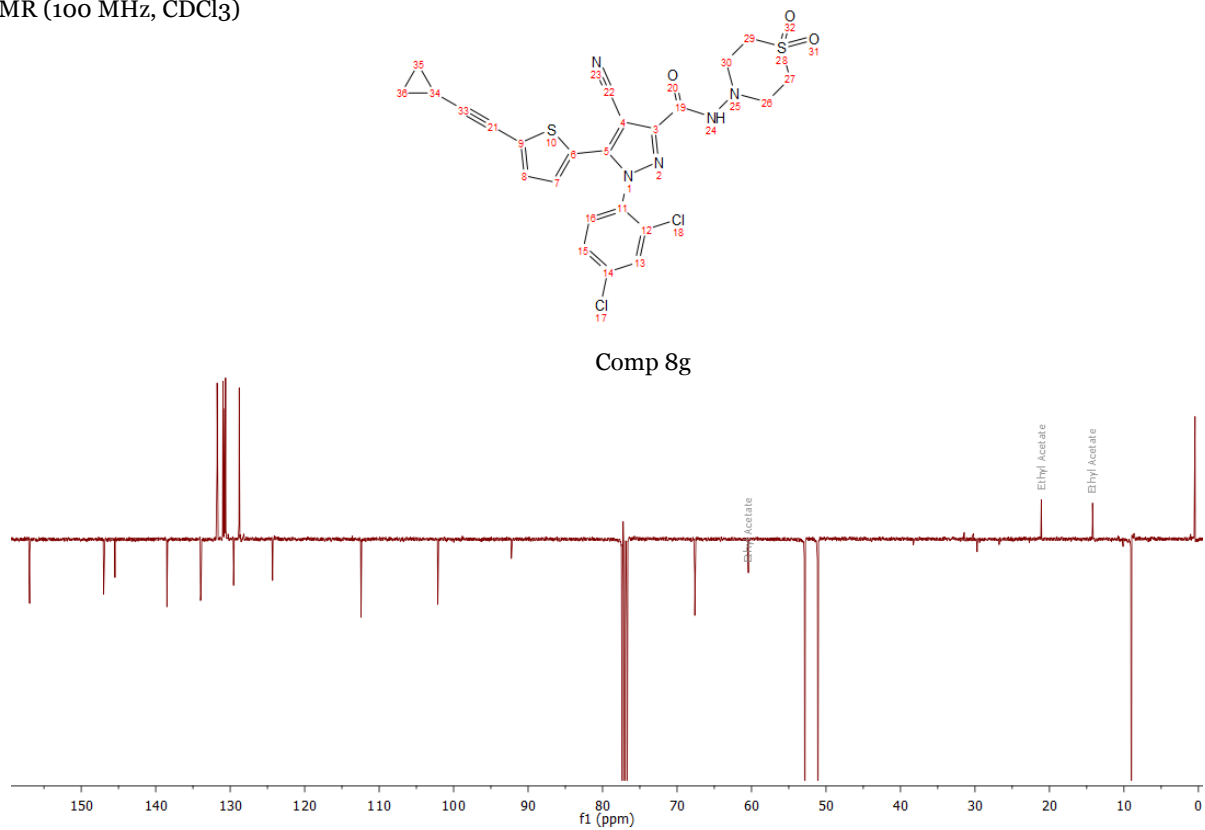

$^1\text{H}$  NMR (400 MHz,  $\text{CDCl}_3$ )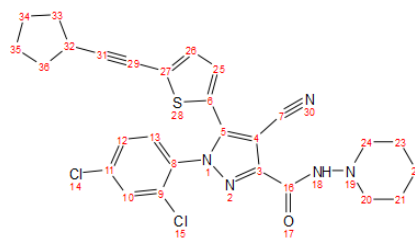

Comp 8i

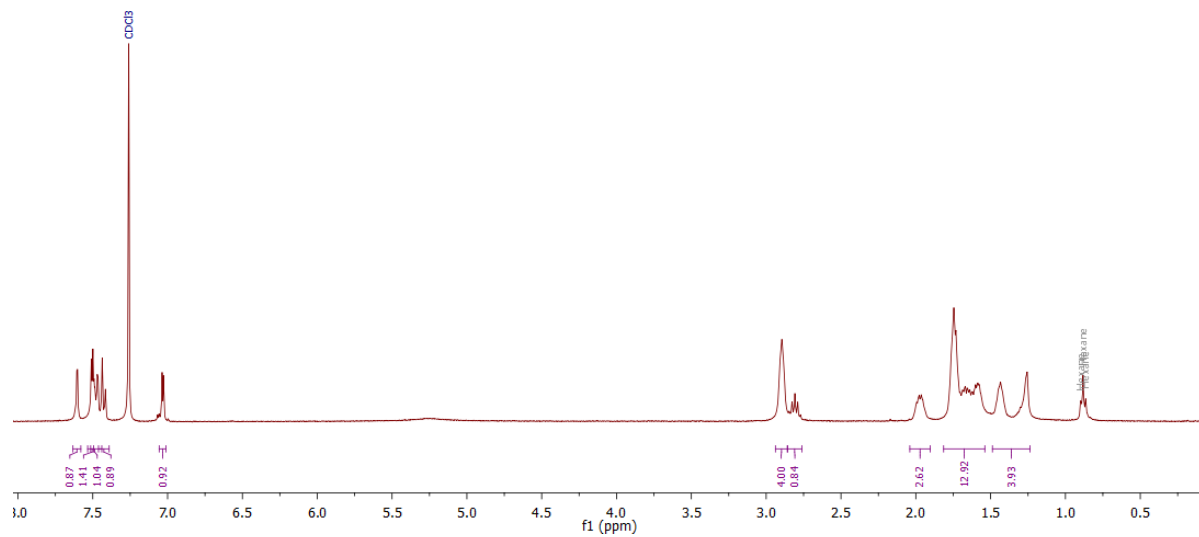 $^{13}\text{C}$  NMR (100 MHz,  $\text{CDCl}_3$ )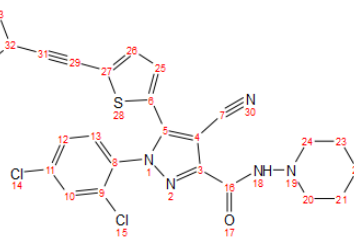

Comp 8i

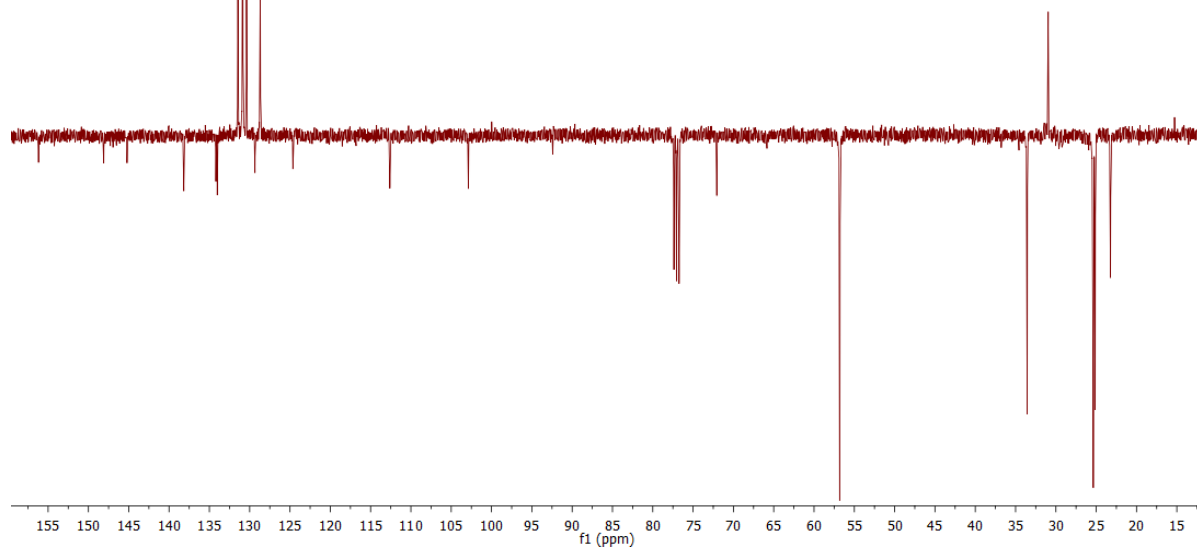

$^1\text{H}$  NMR (400 MHz,  $\text{CDCl}_3$ )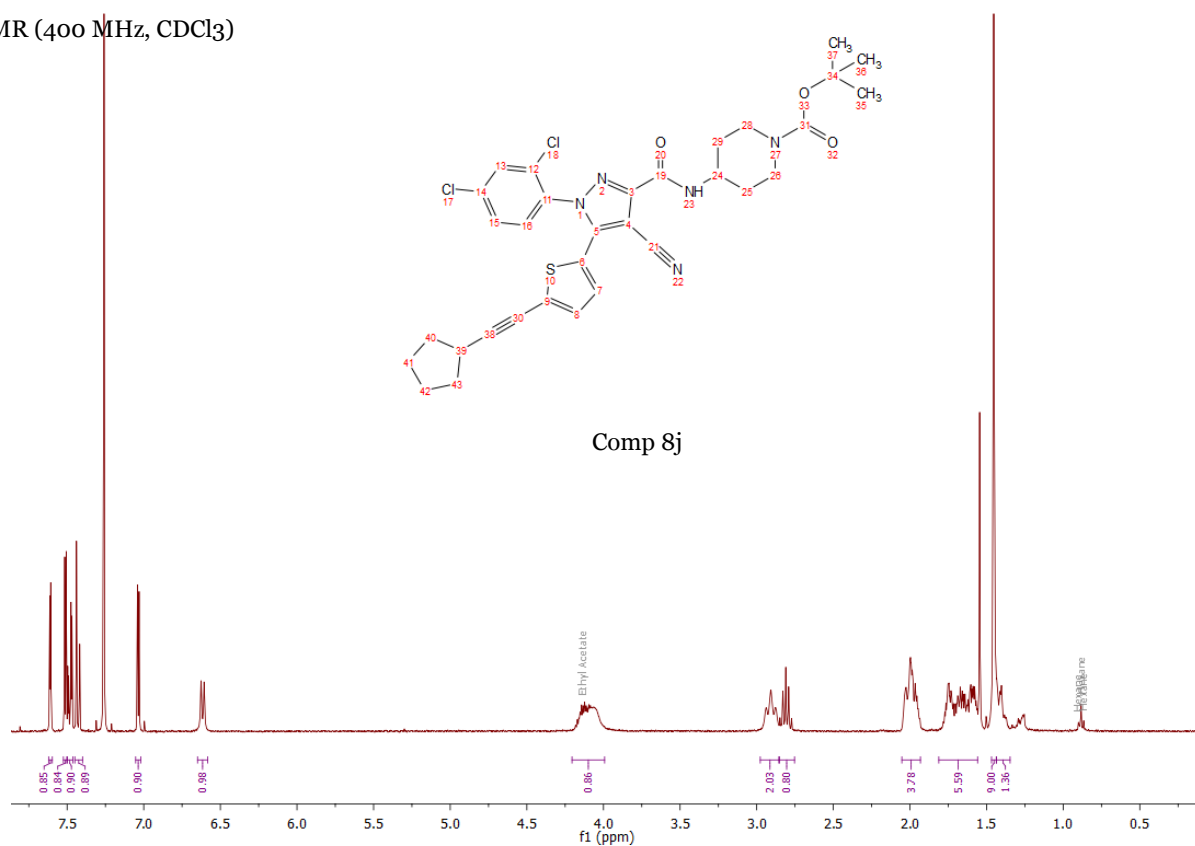 $^{13}\text{C}$  NMR (100 MHz,  $\text{CDCl}_3$ )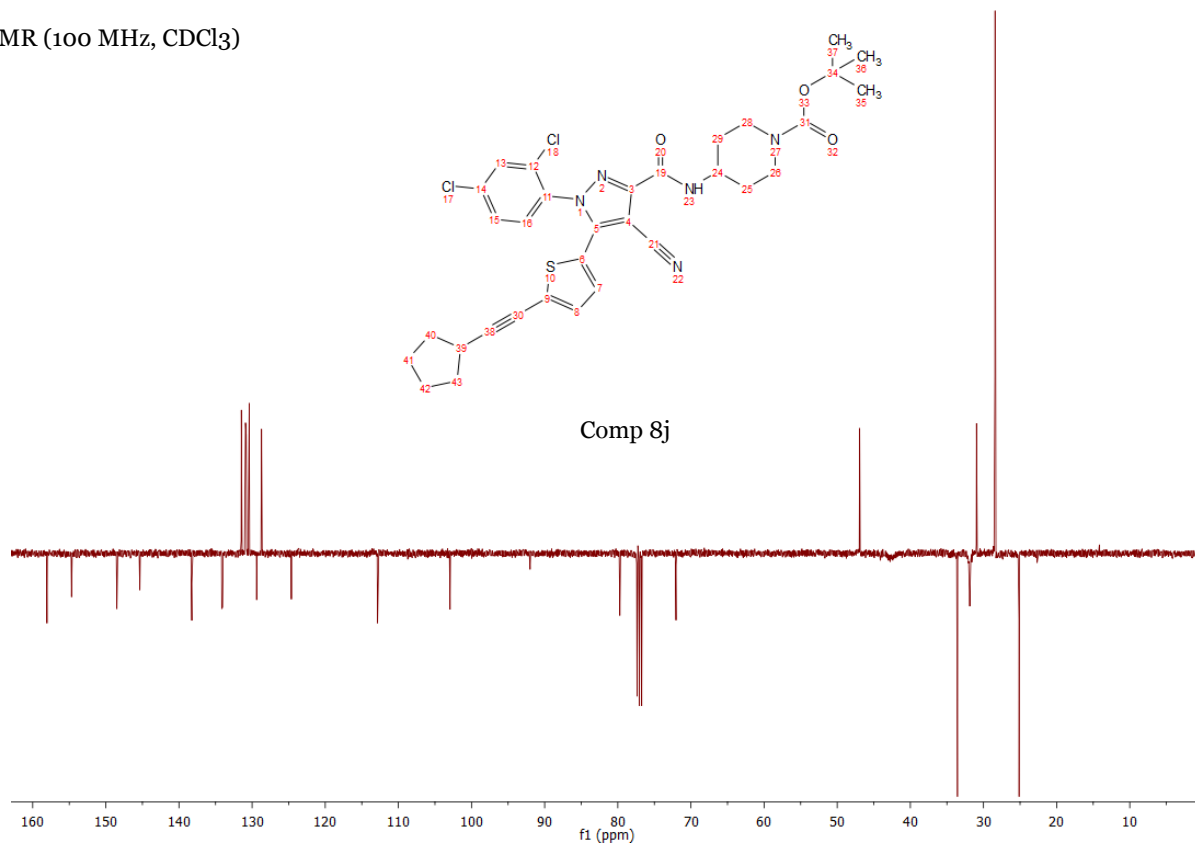

$^1\text{H}$  NMR (400 MHz,  $\text{CDCl}_3$ )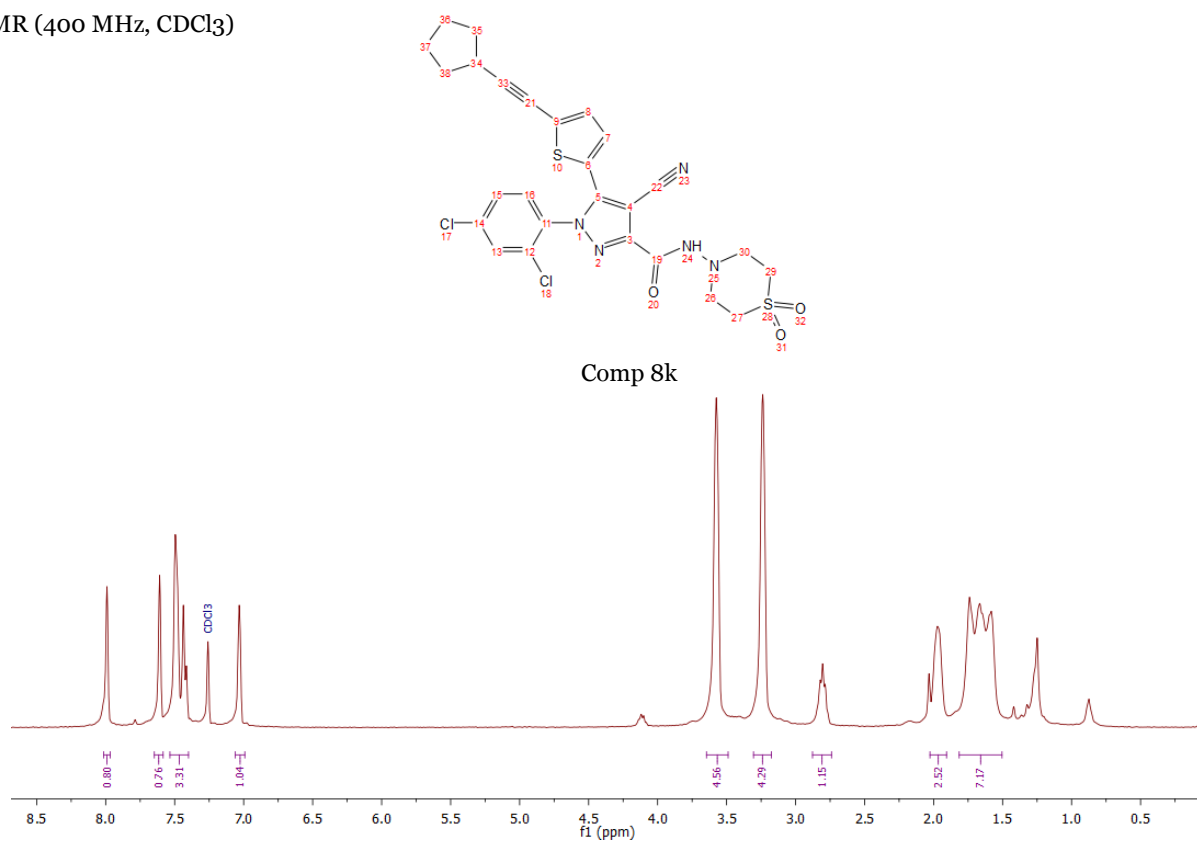 $^{13}\text{C}$  NMR (100 MHz,  $\text{CDCl}_3$ )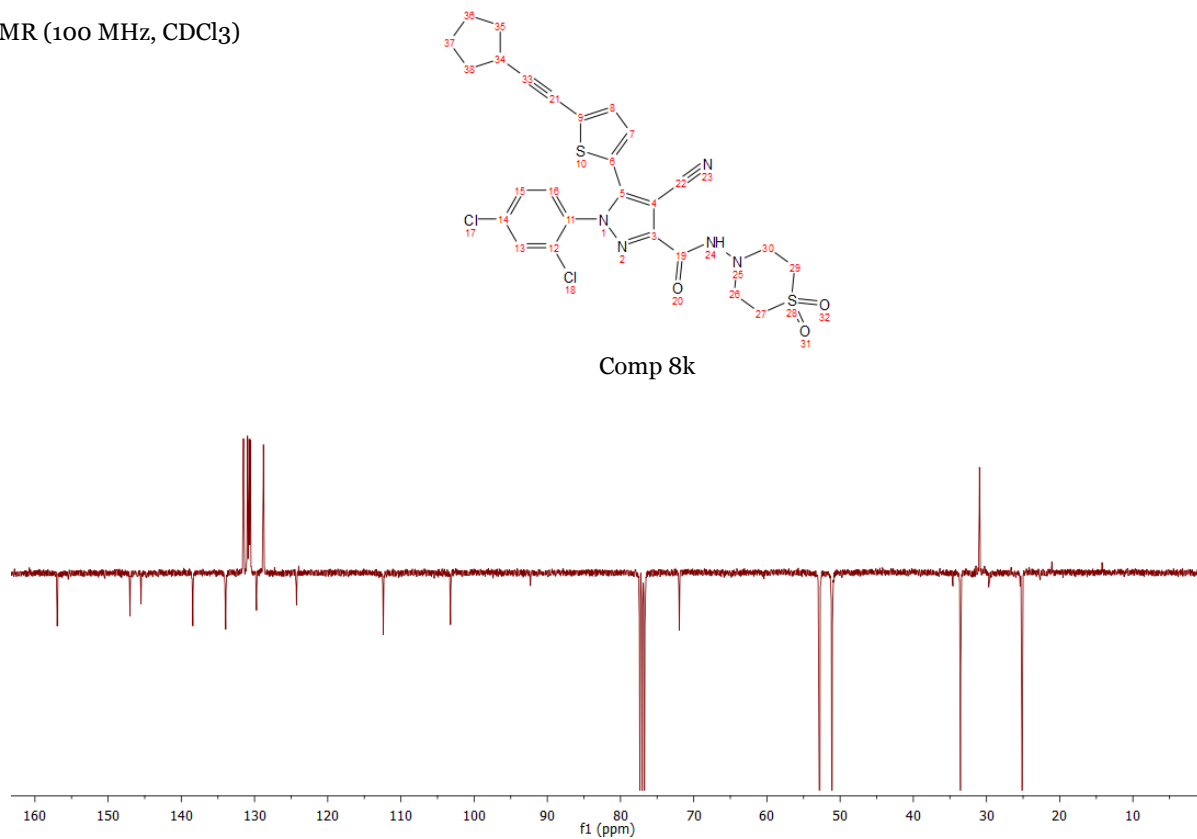



$^1\text{H}$  NMR (400 MHz,  $\text{CDCl}_3$ )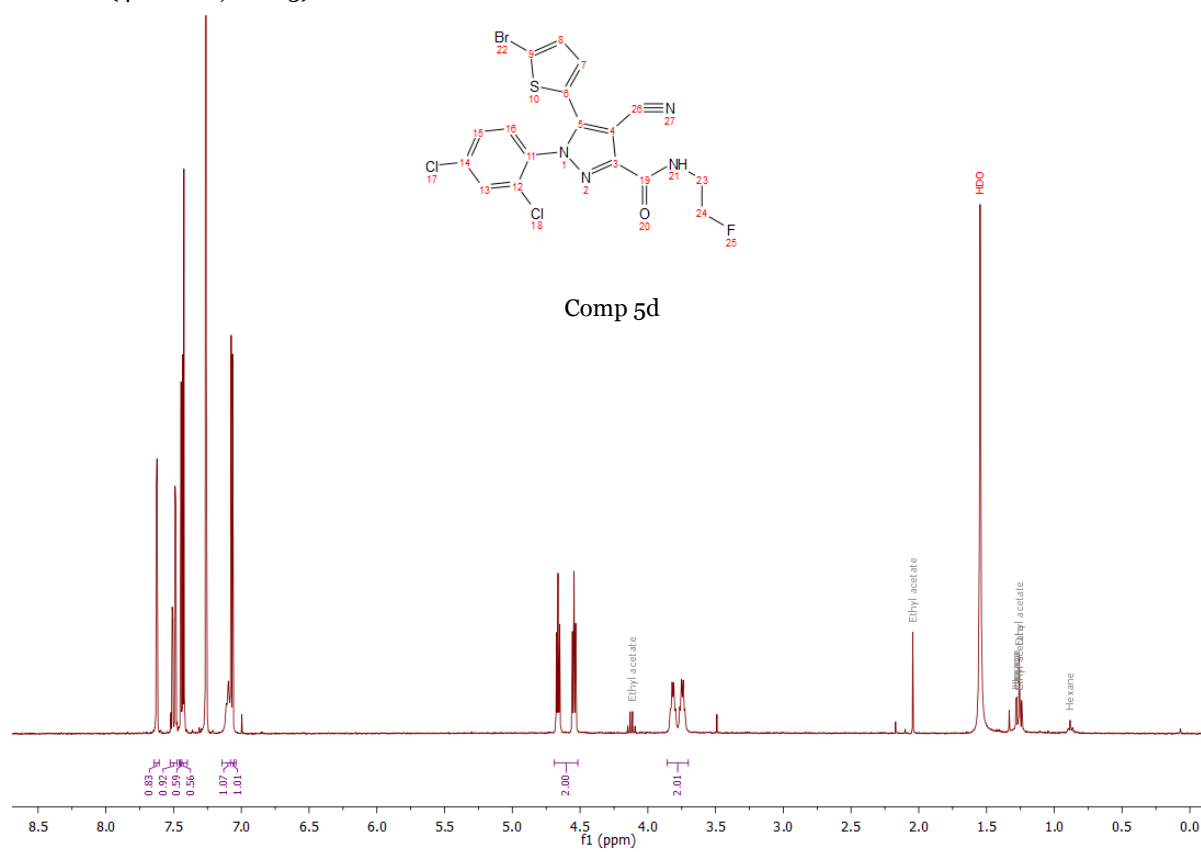

$^{13}\text{C}$  NMR (100 MHz,  $\text{CDCl}_3$ )

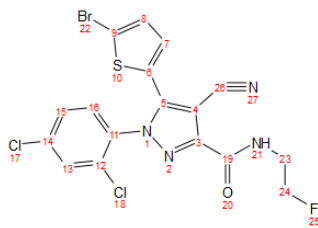

Comp 5d

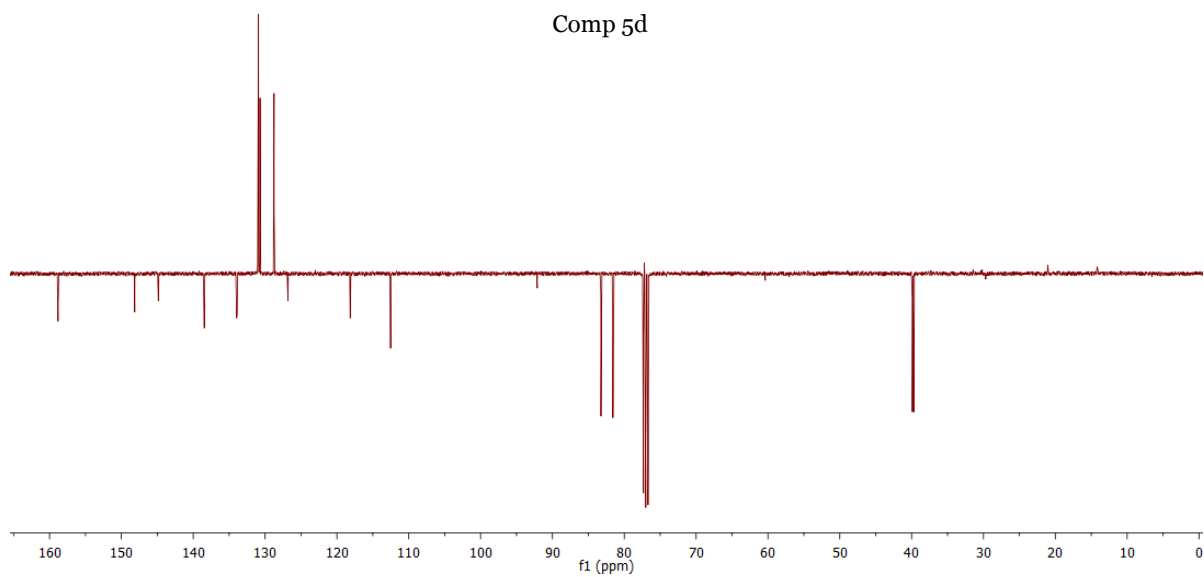

$^{19}\text{F}$  NMR (376 MHz,  $\text{CDCl}_3$ )

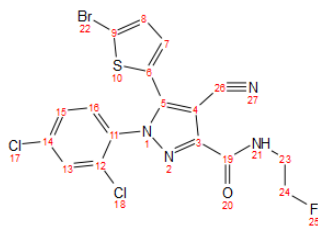

Comp 5d

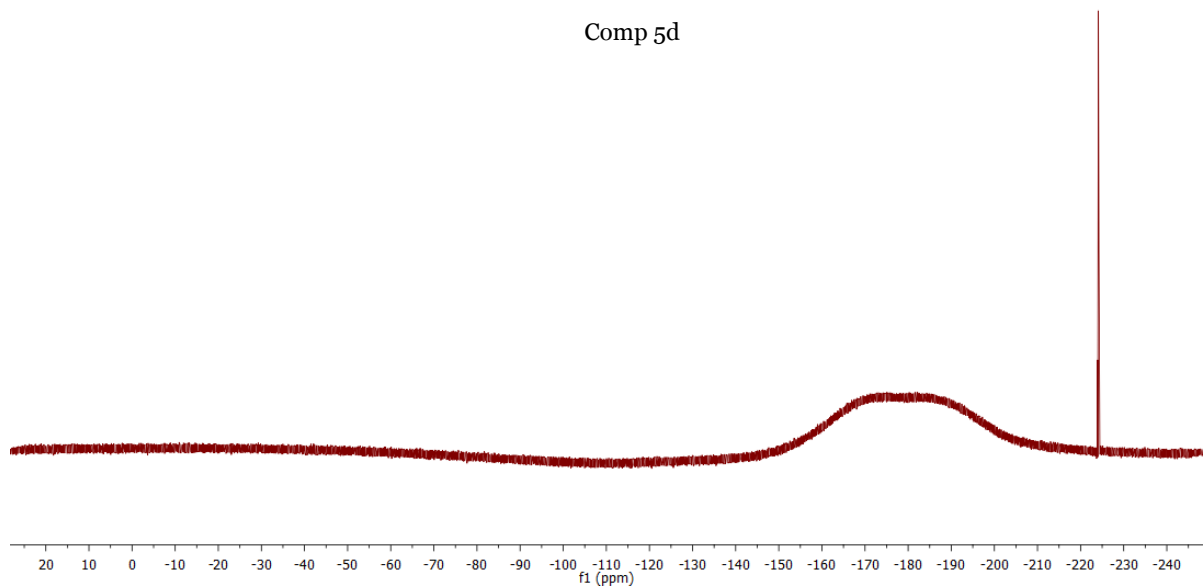

$^1\text{H}$  NMR (400 MHz,  $\text{CDCl}_3$ )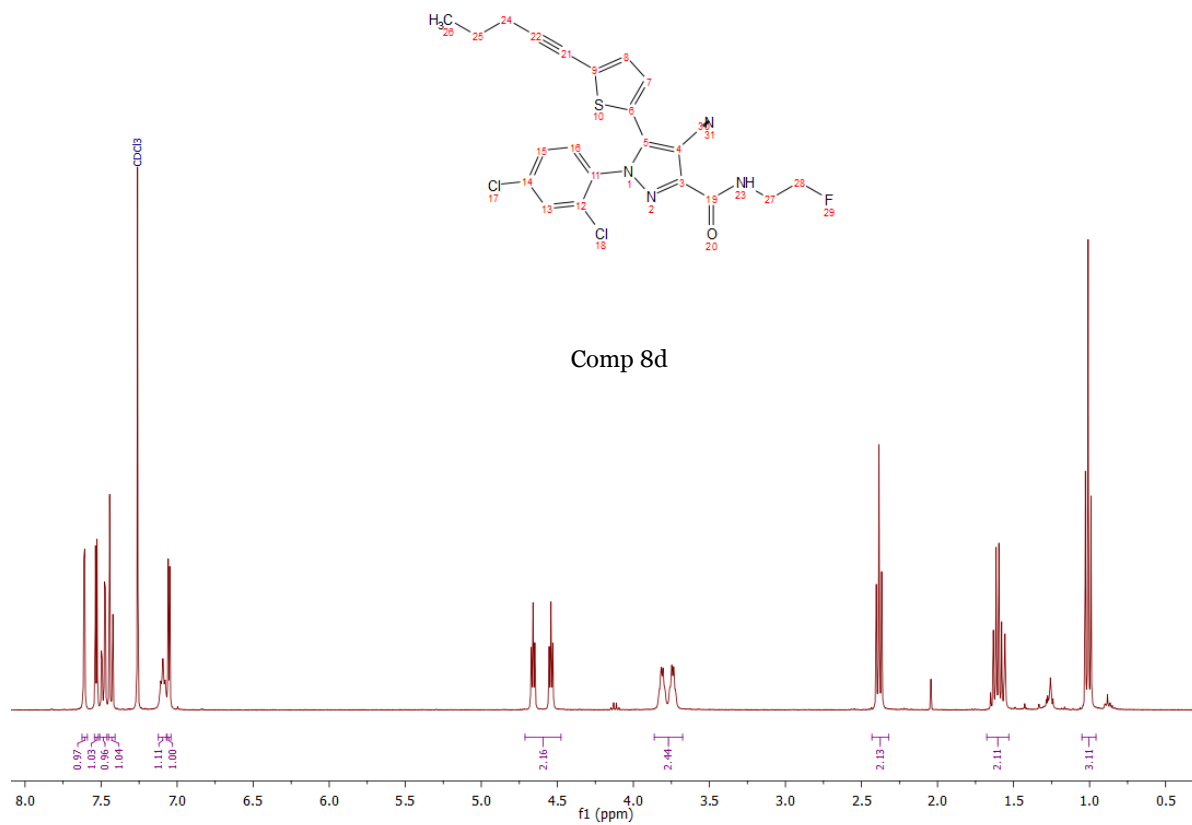 $^{13}\text{C}$  NMR (100 MHz,  $\text{CDCl}_3$ )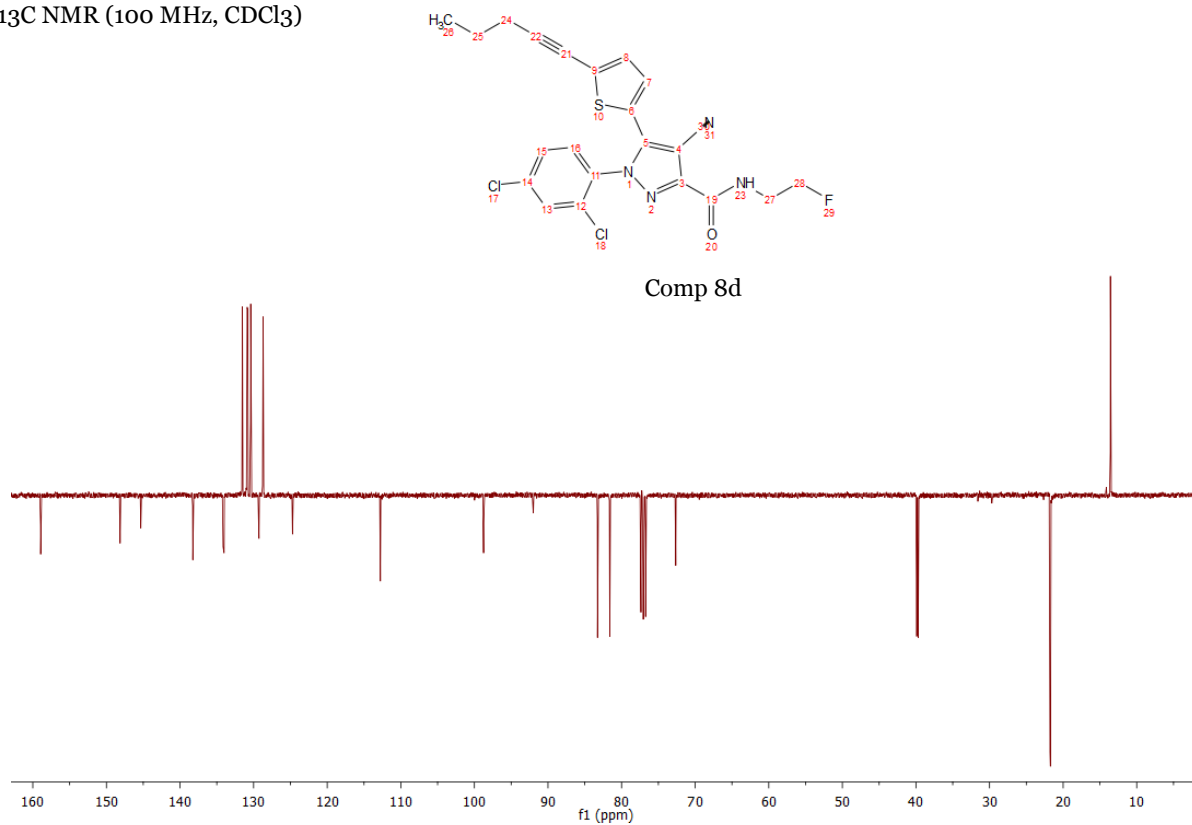

$^{19}\text{F}$  NMR (376 MHz,  $\text{CDCl}_3$ )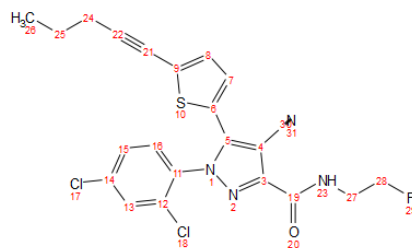

Comp 8d

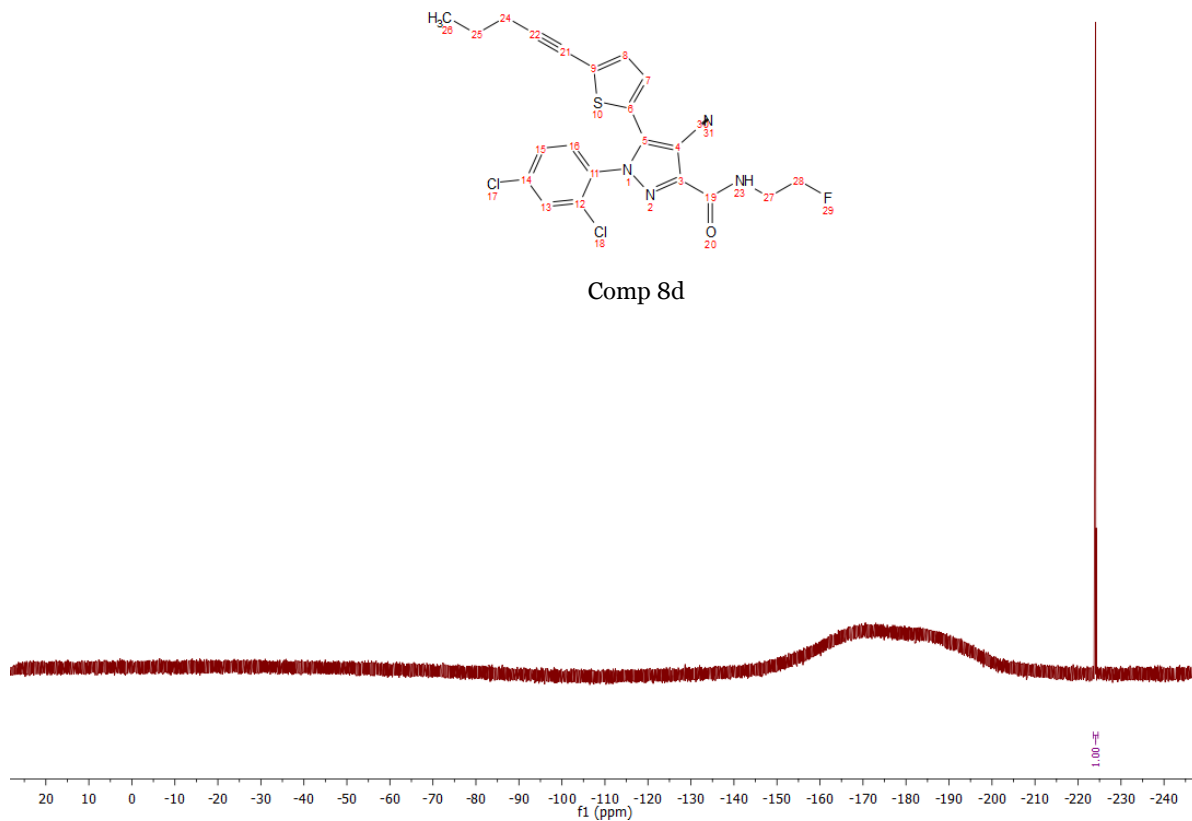 $^1\text{H}$  NMR (400 MHz,  $\text{CDCl}_3$ )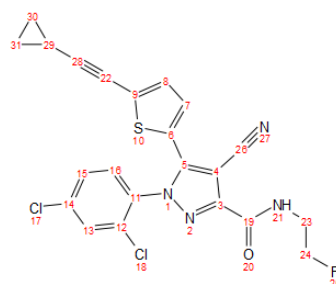

Comp 8h

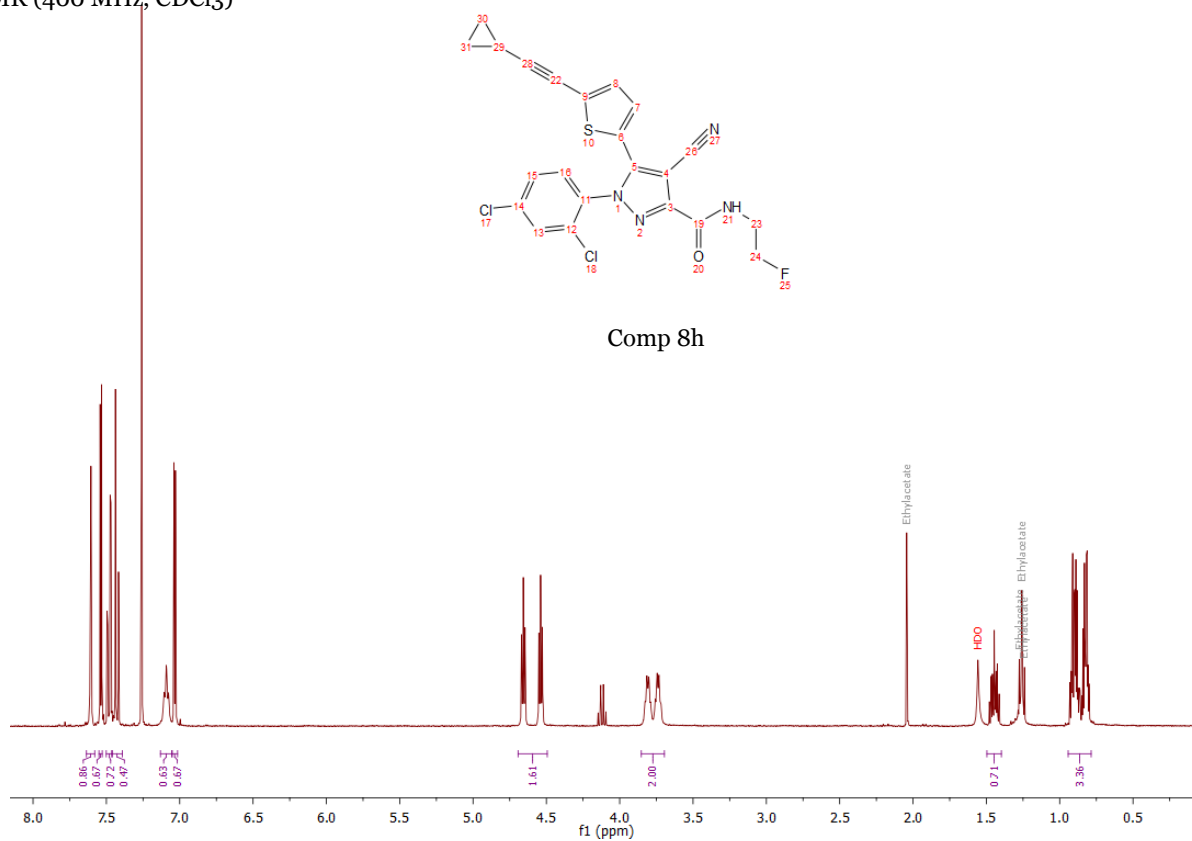

$^{13}\text{C}$  NMR (100 MHz,  $\text{CDCl}_3$ )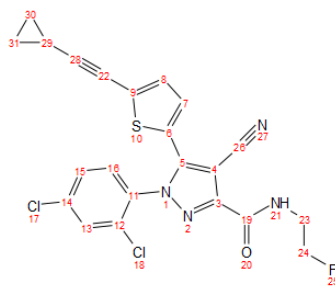

Comp 8h

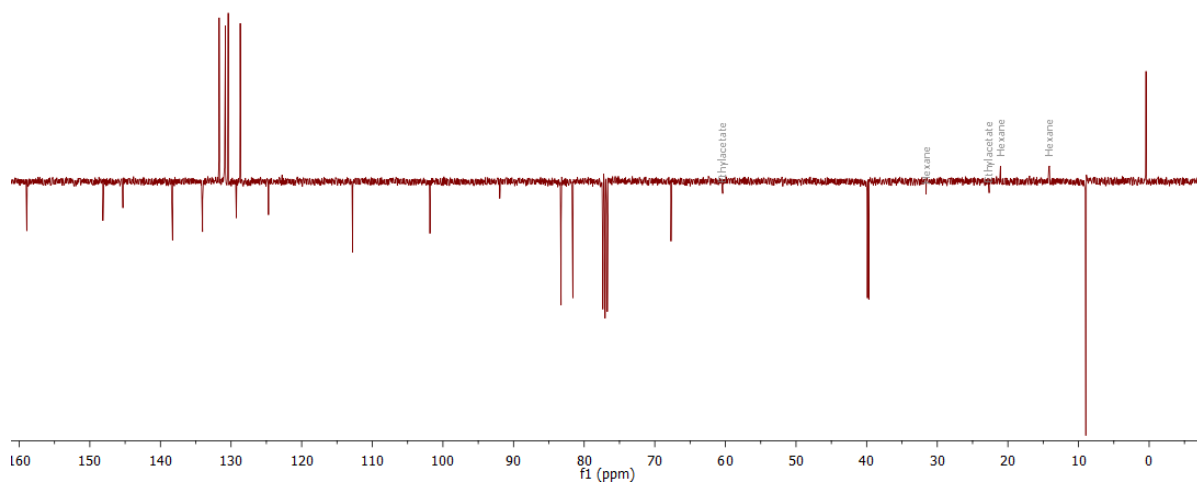 $^{19}\text{F}$  NMR (376 MHz,  $\text{CDCl}_3$ )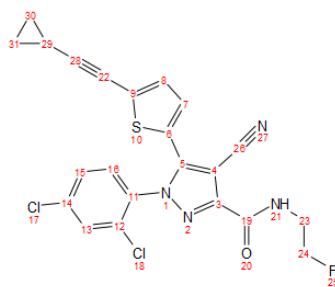

Comp 8h

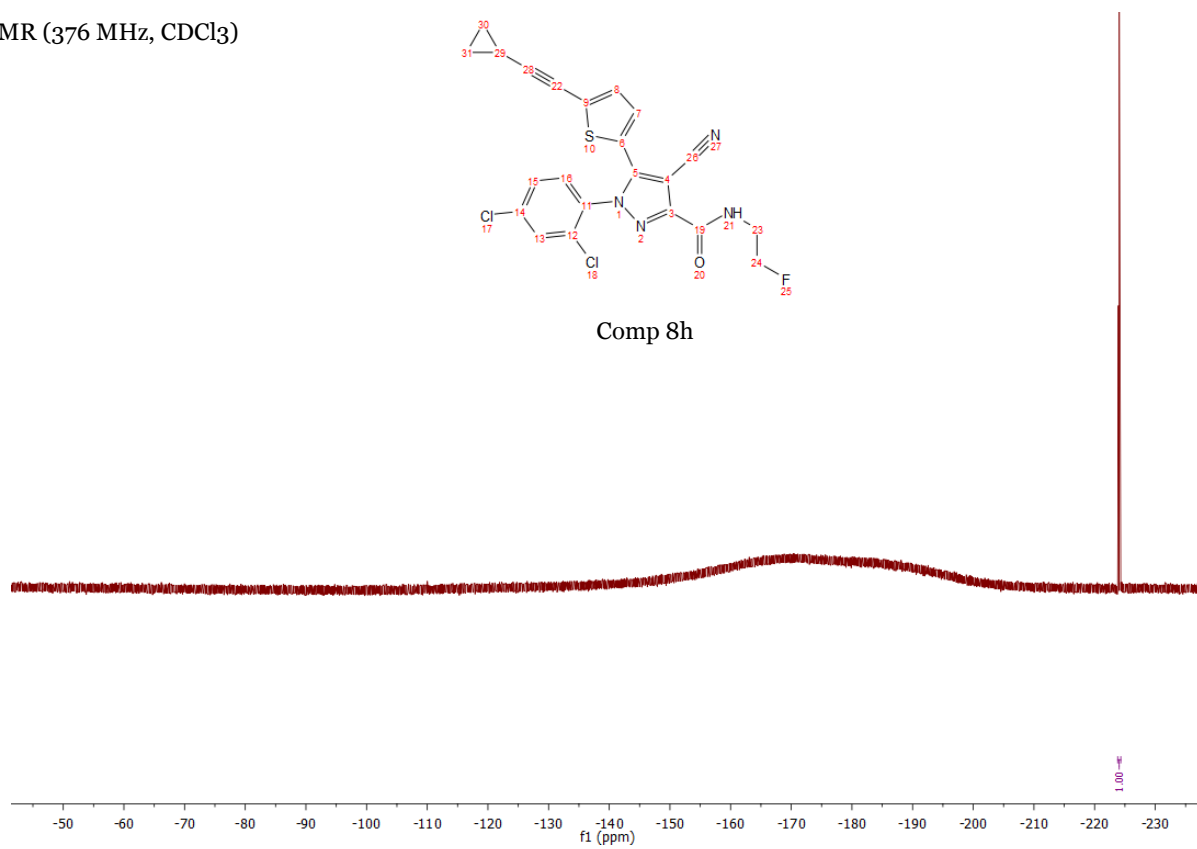

$^1\text{H}$  NMR (400 MHz,  $\text{CDCl}_3$ )

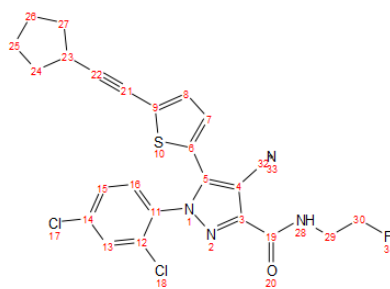

Comp 81

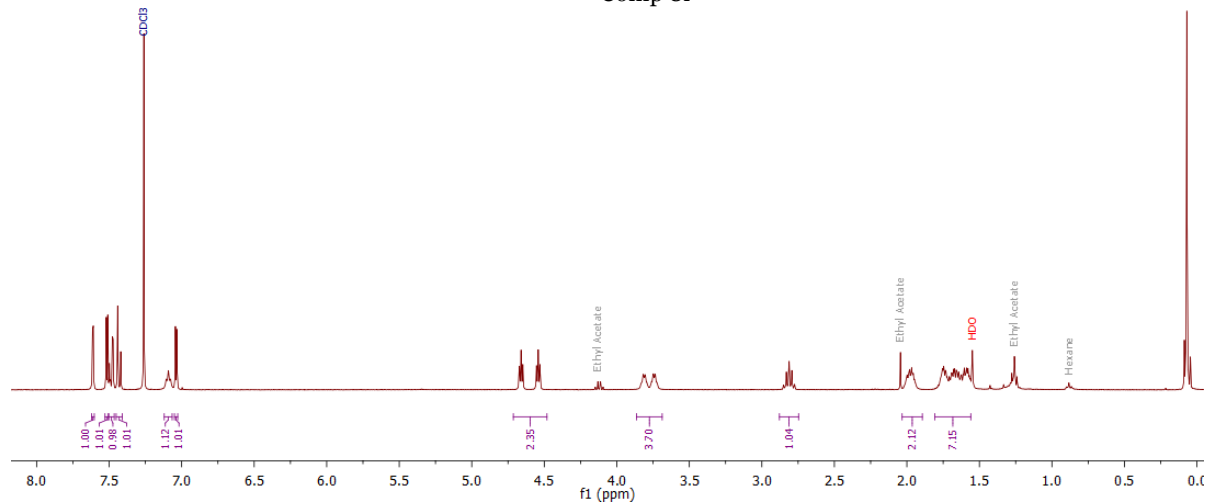

$^{13}\text{C}$  NMR (100 MHz,  $\text{CDCl}_3$ )

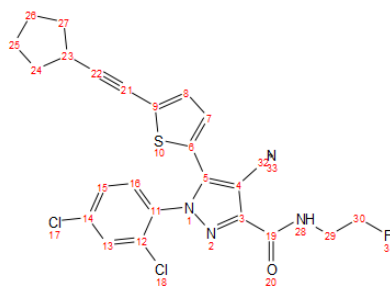

Comp 81

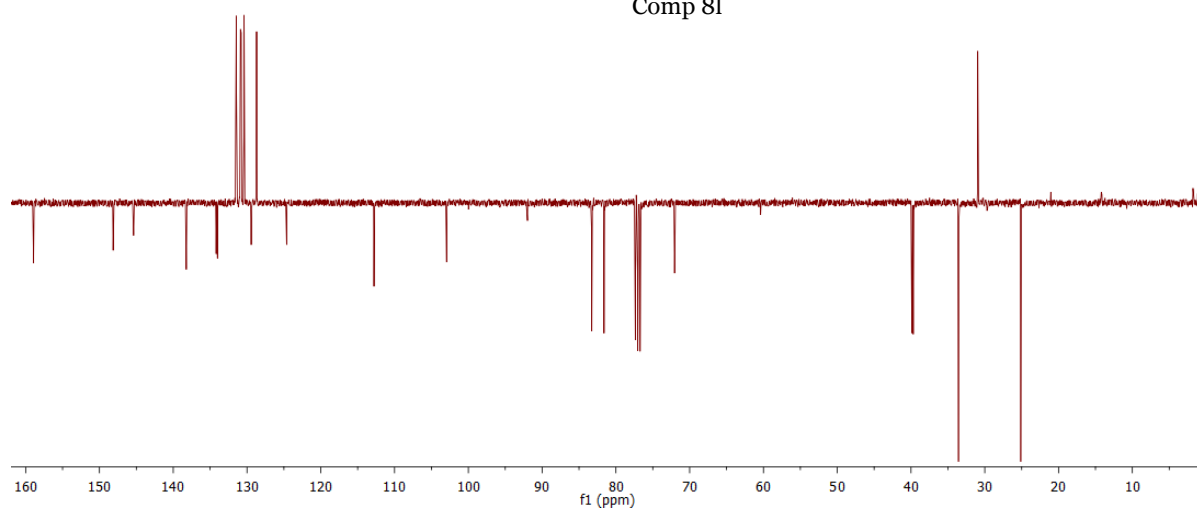

$^{19}\text{F}$  NMR (376 MHz,  $\text{CDCl}_3$ )

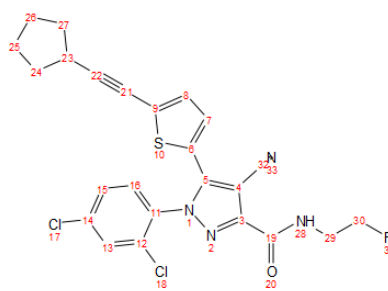

Comp 8l

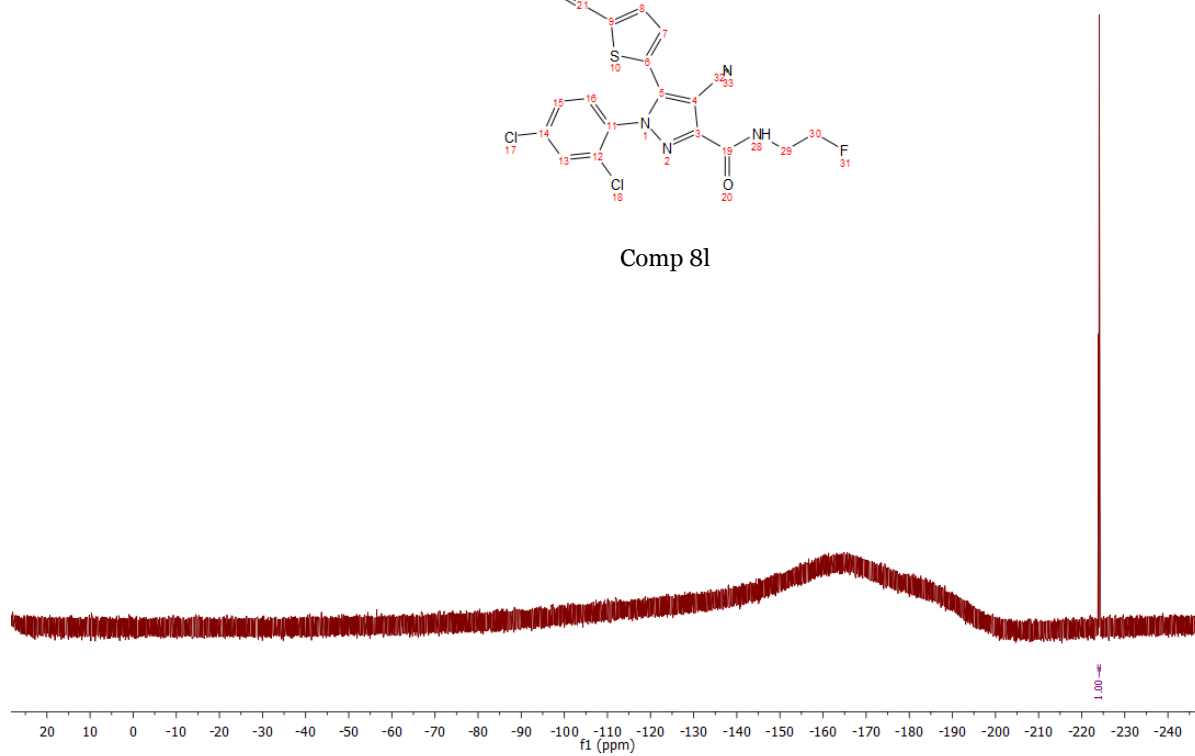

$K_i$  measurements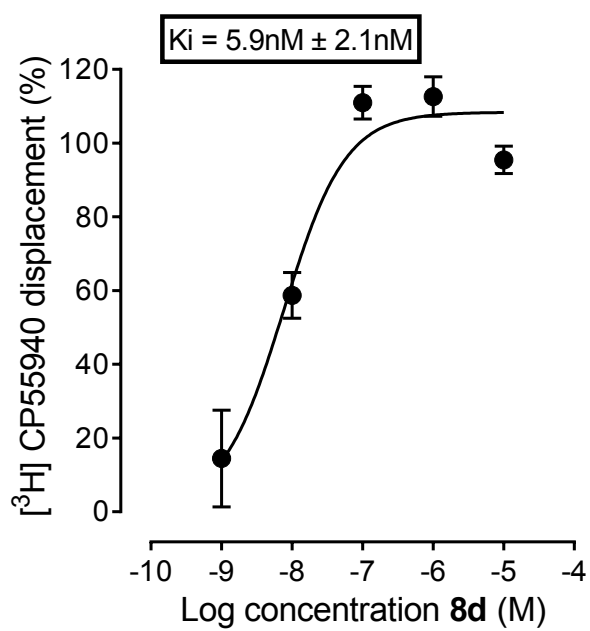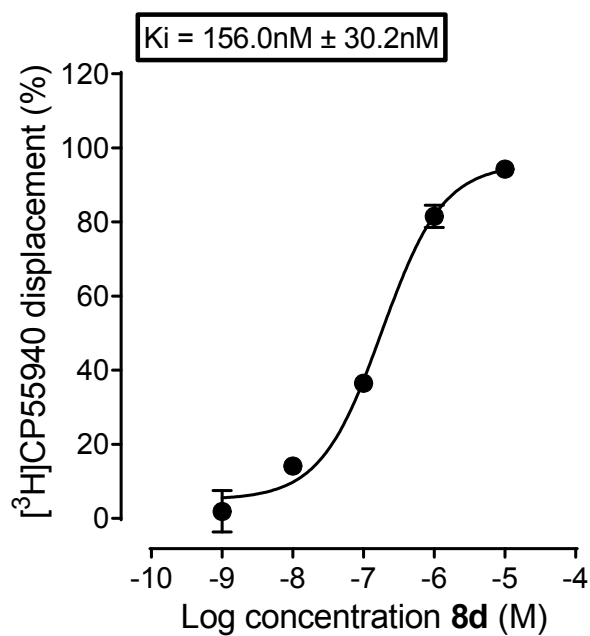



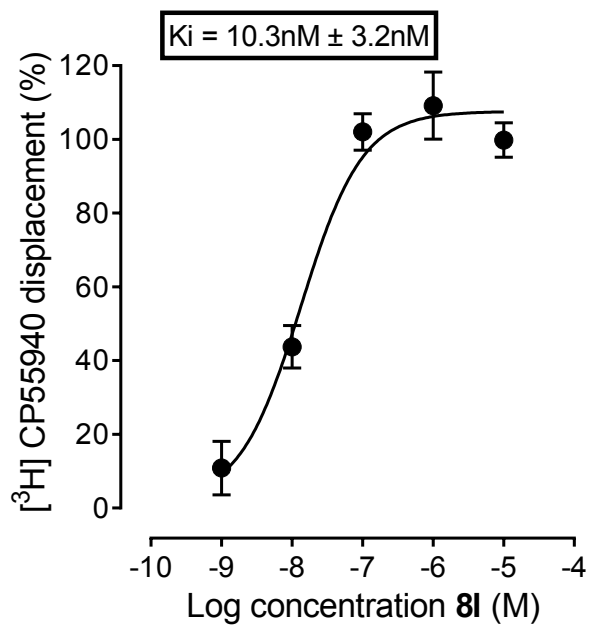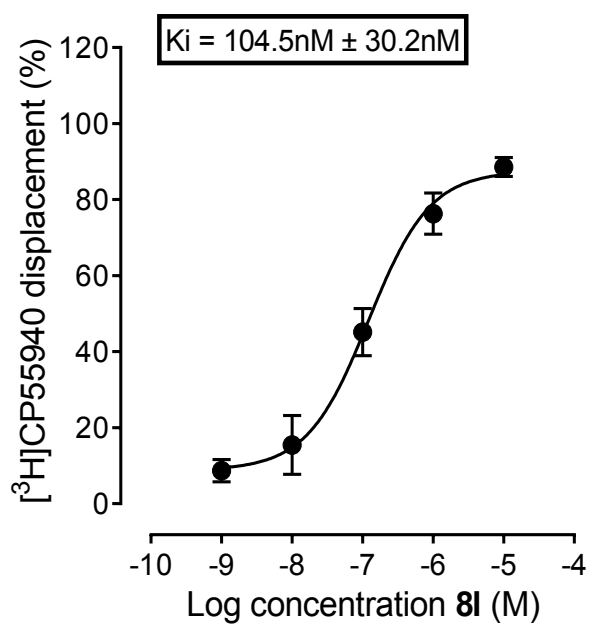

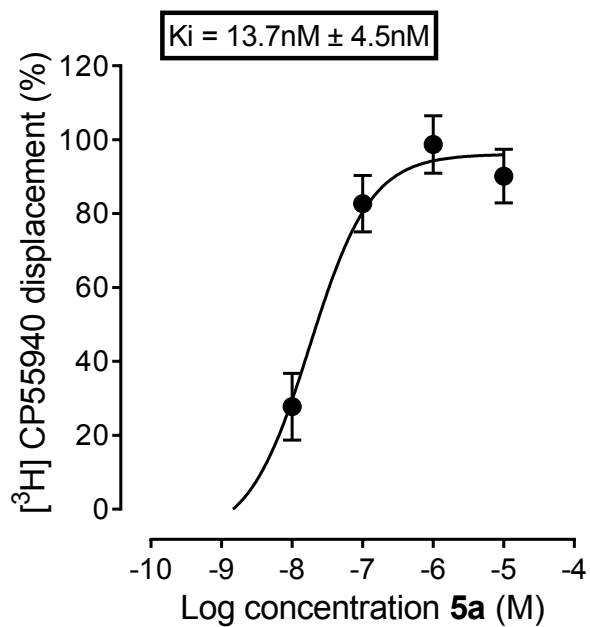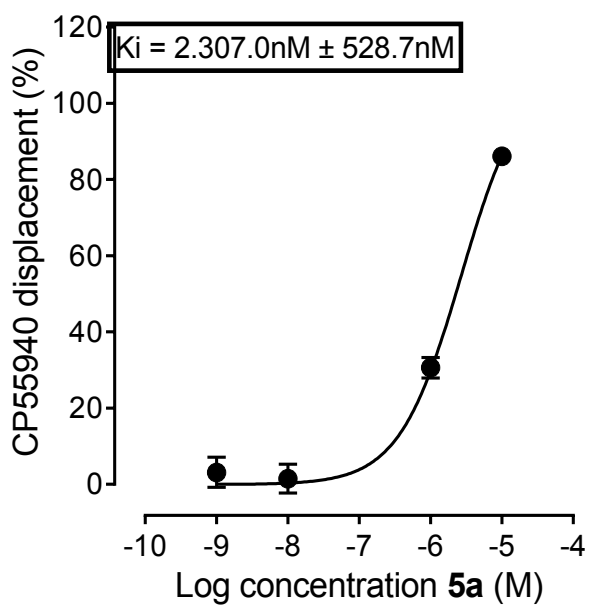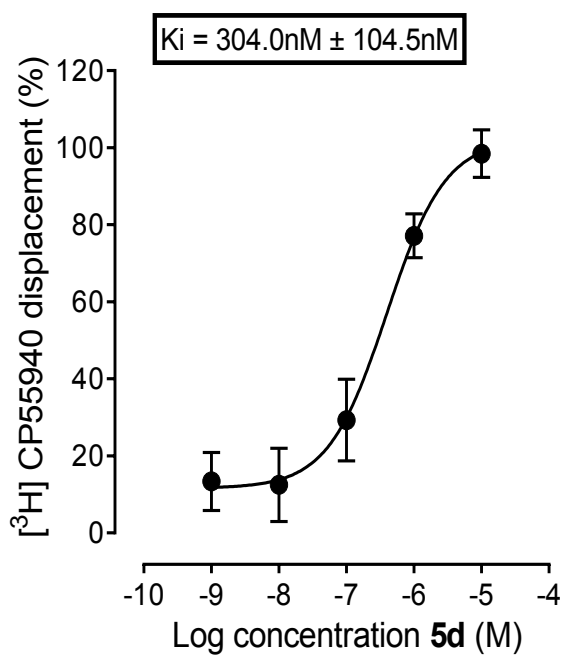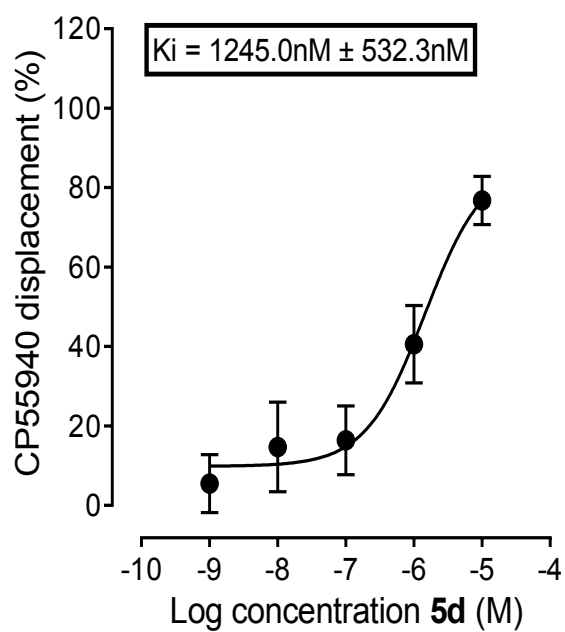

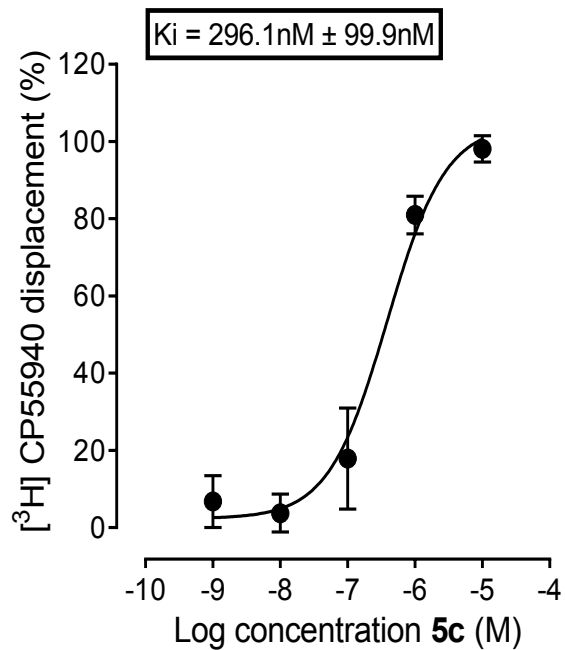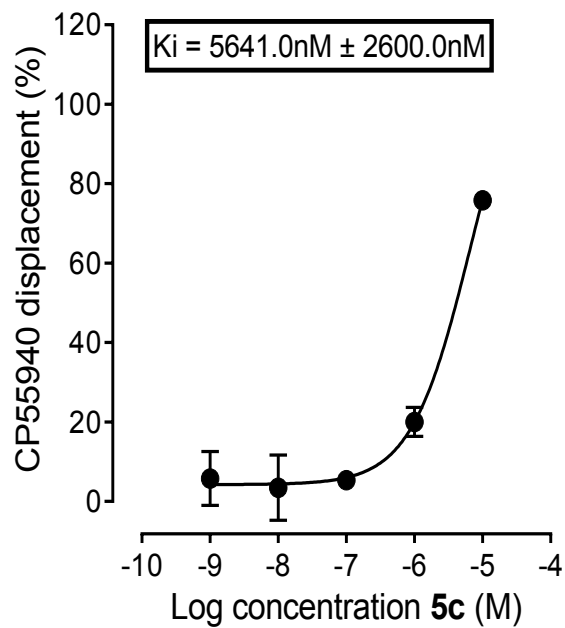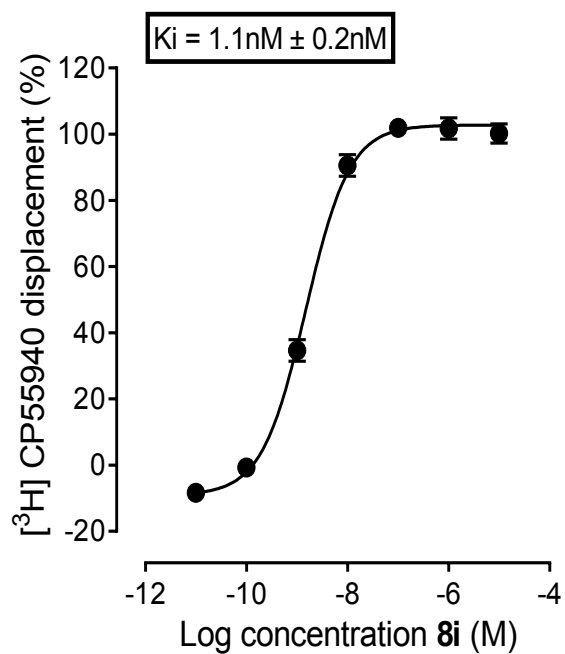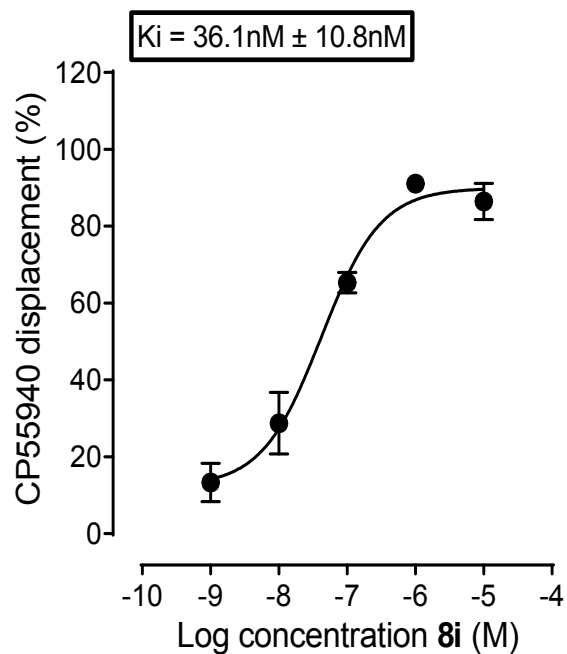

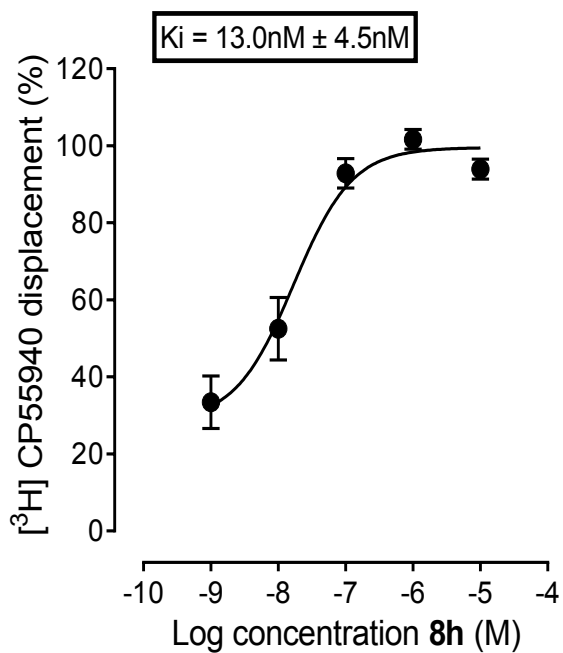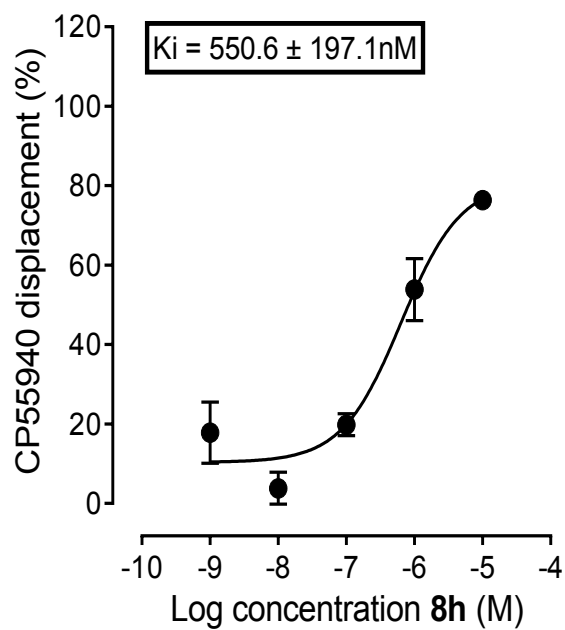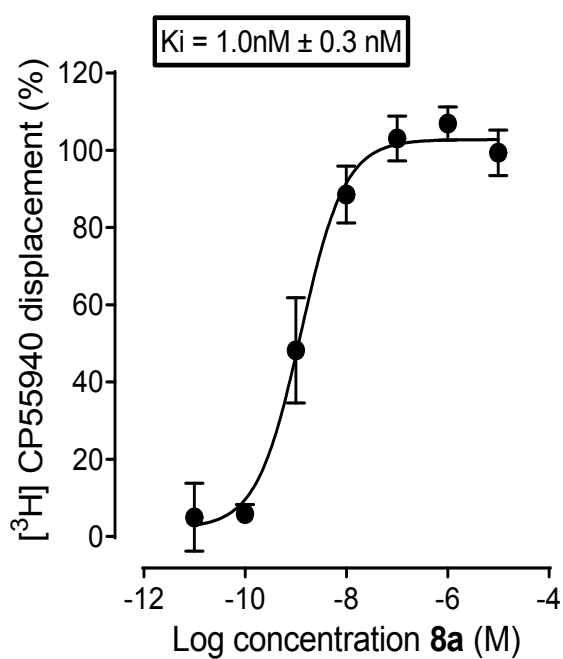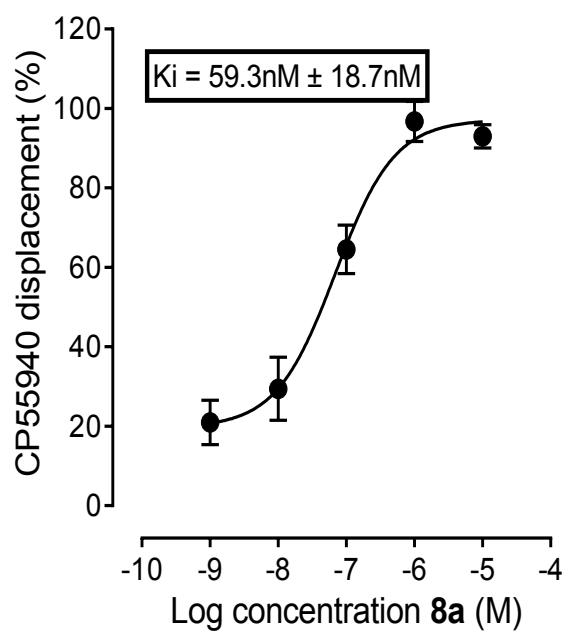

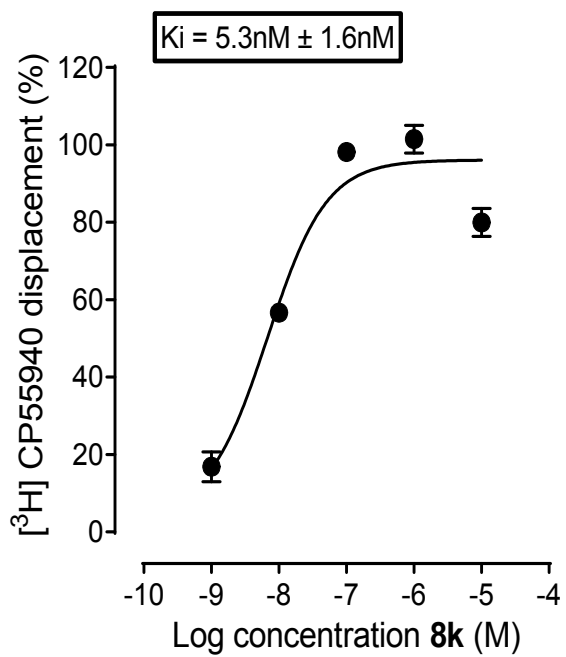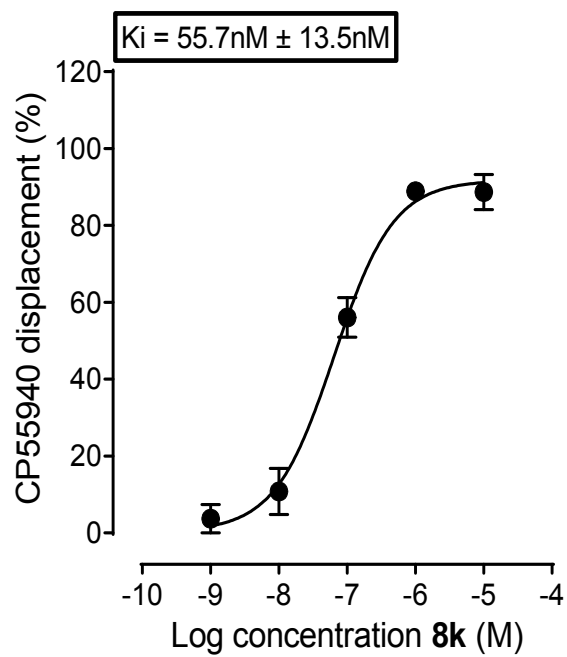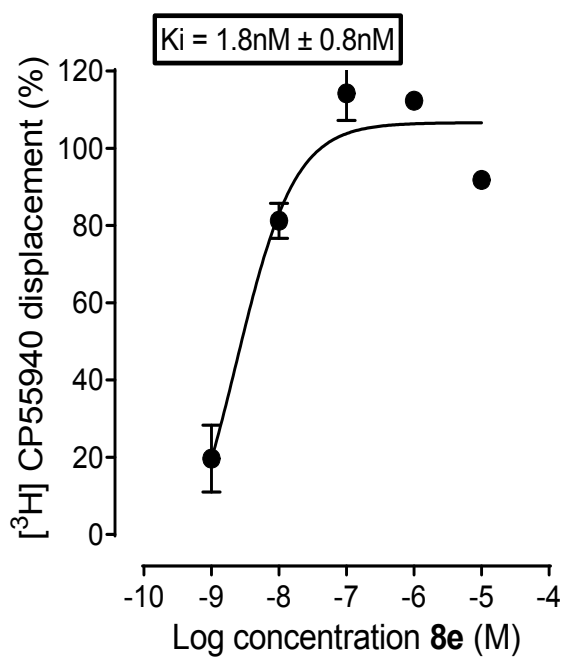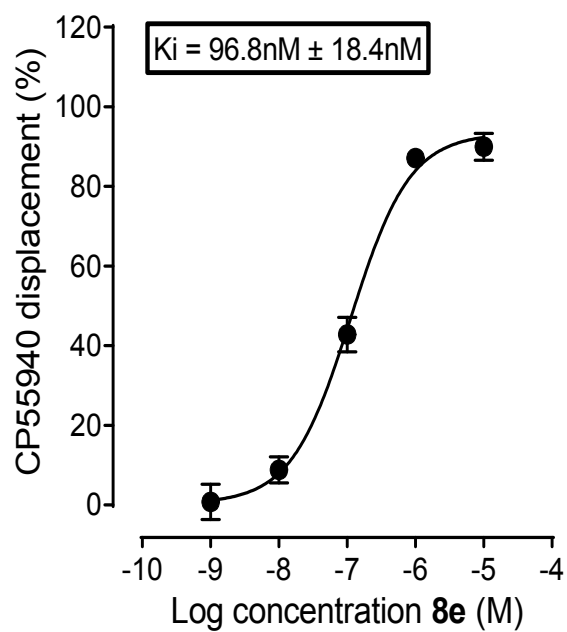

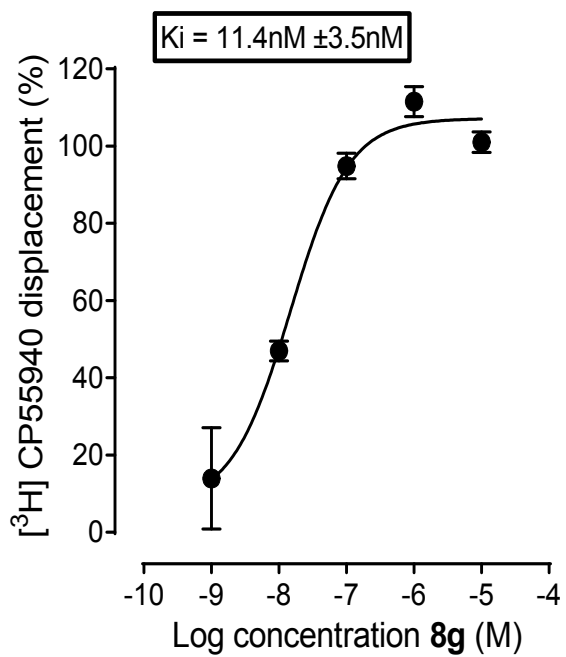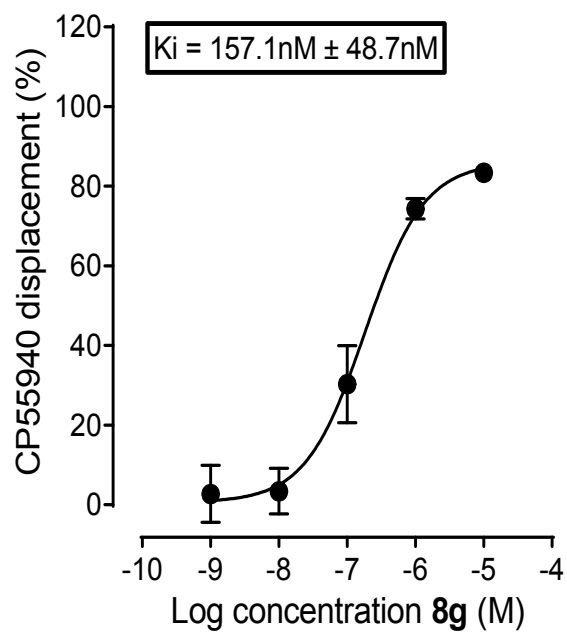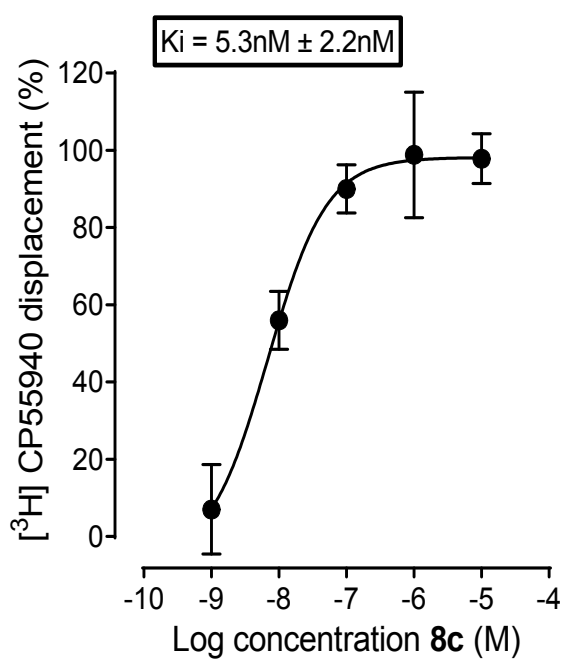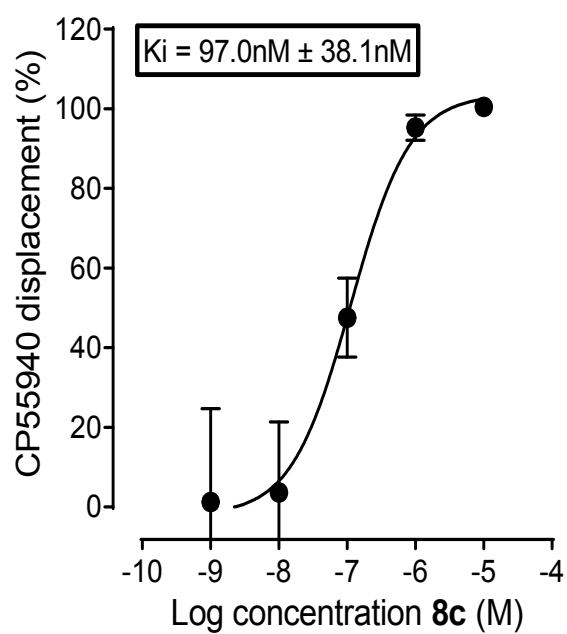

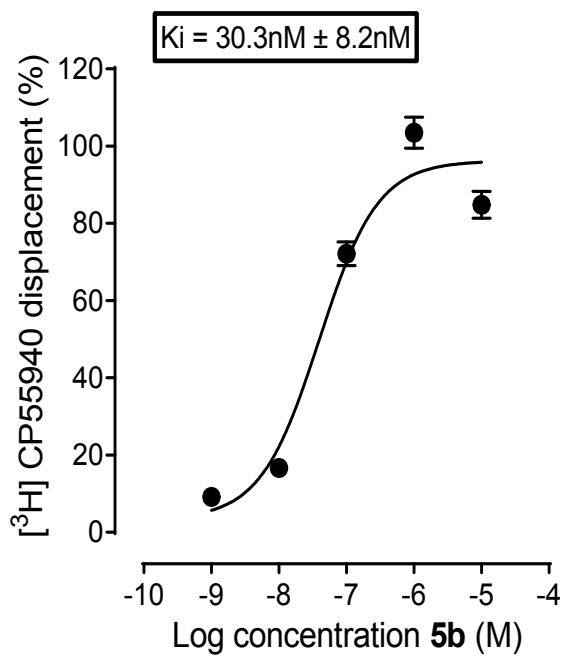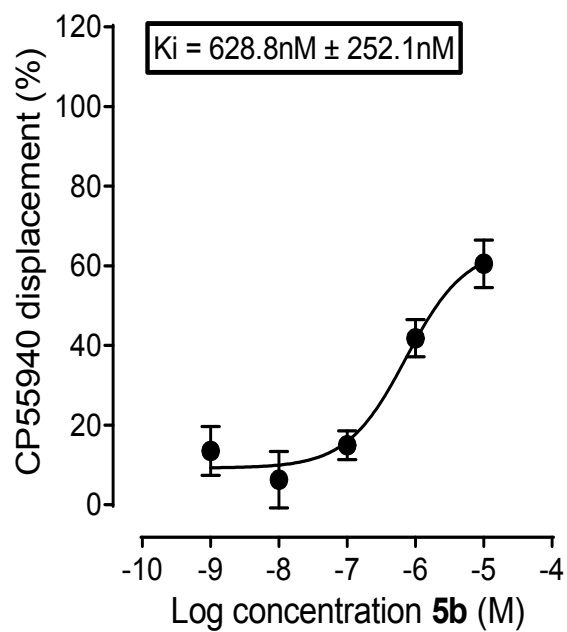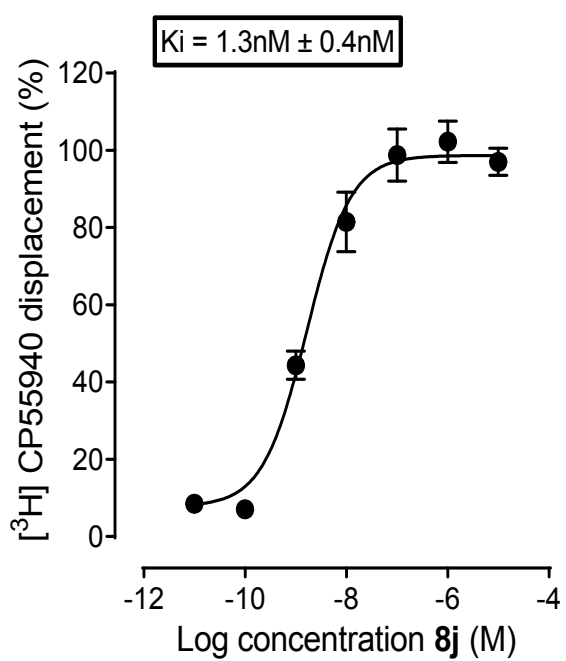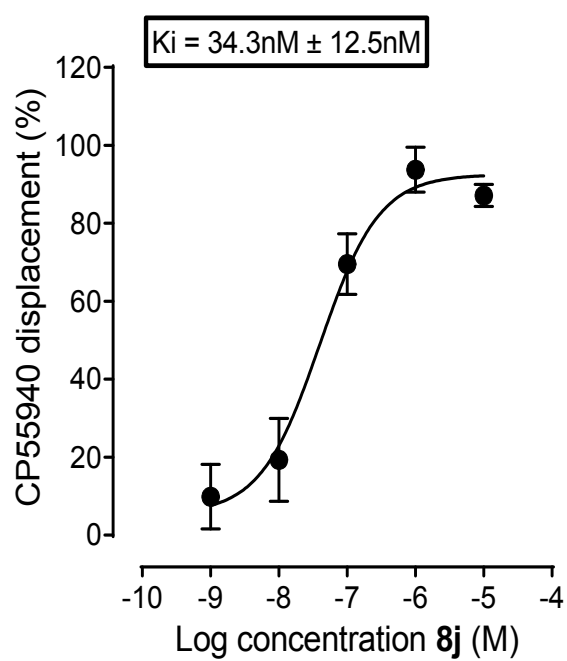

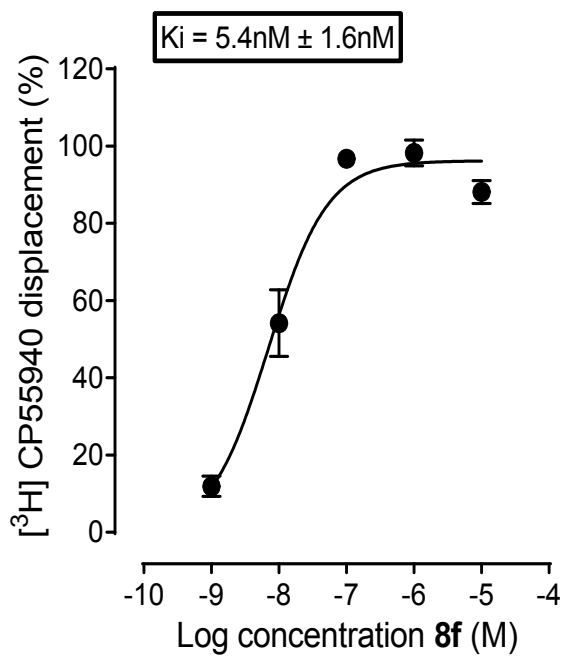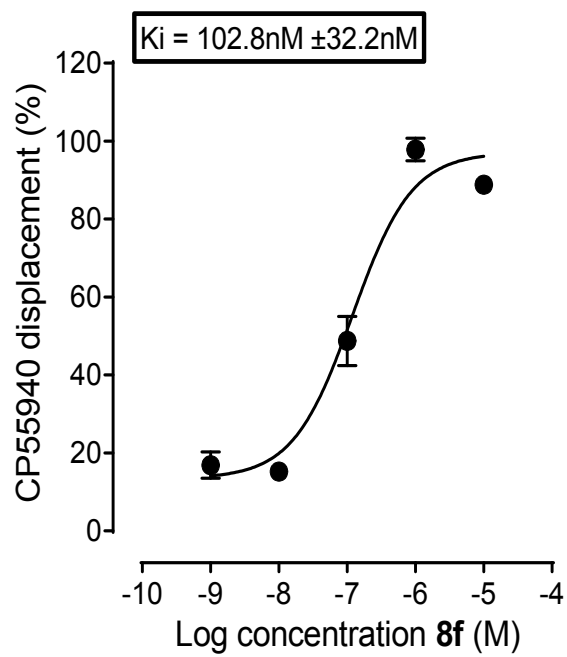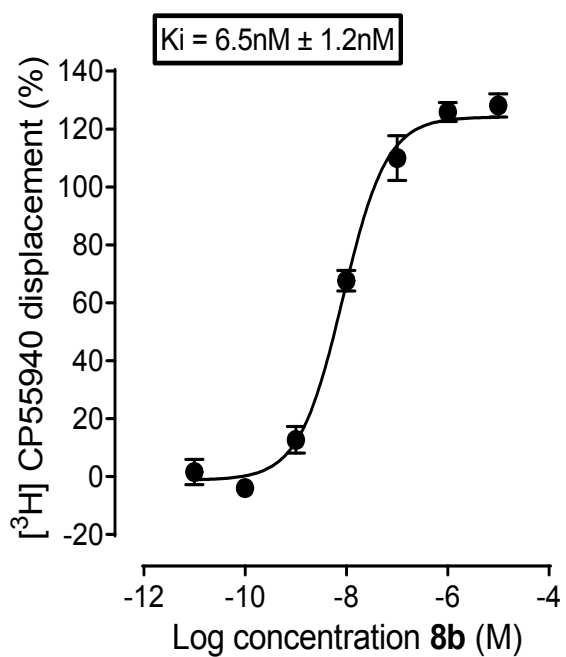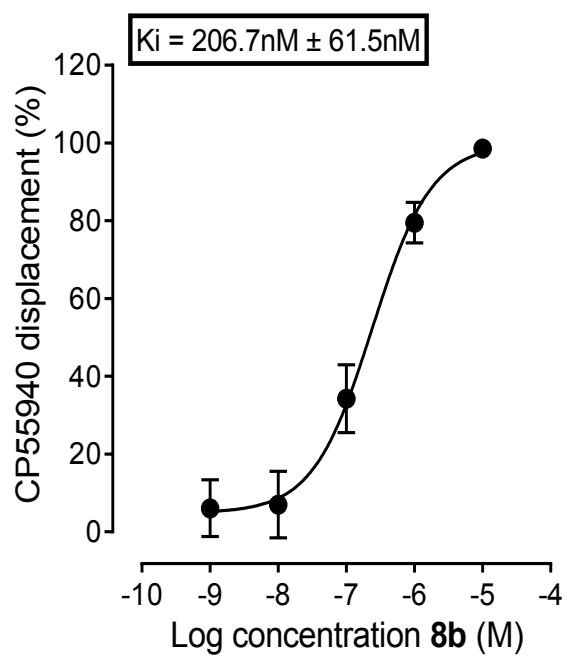



## Functional assays

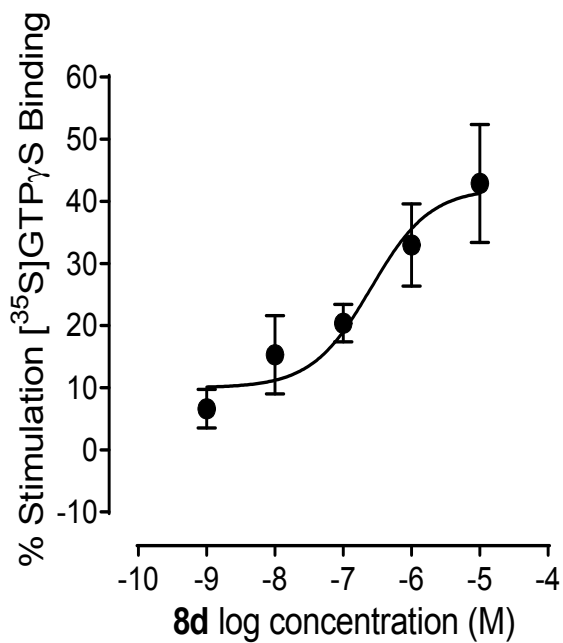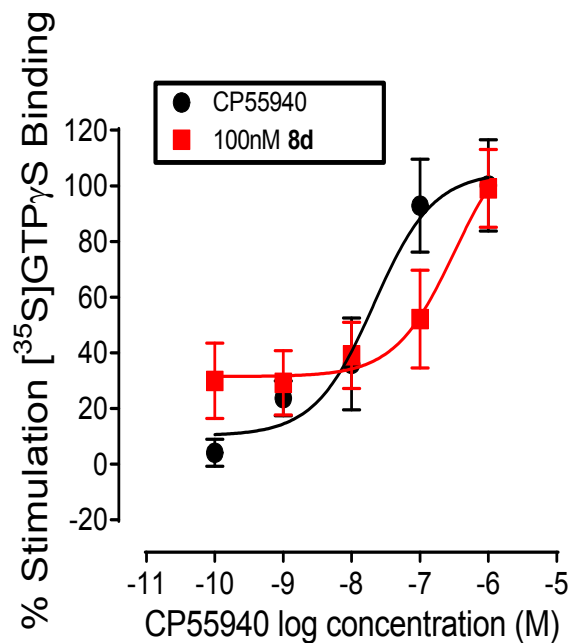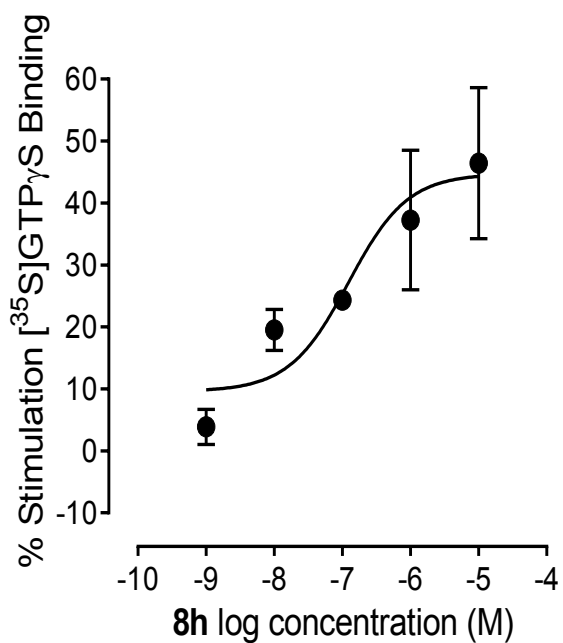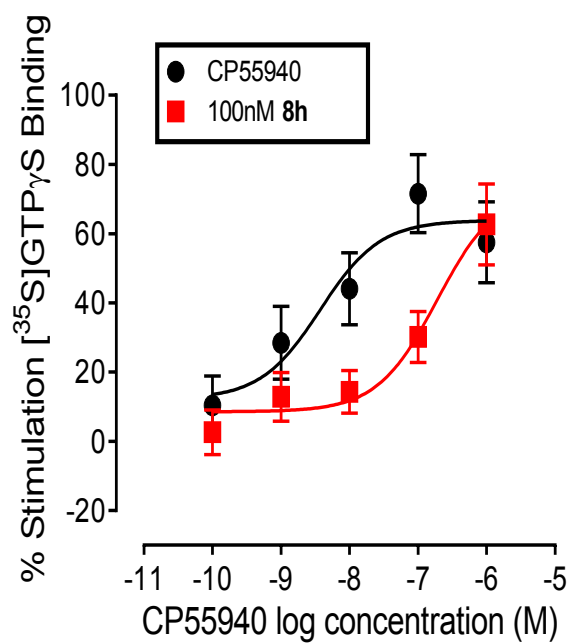

Supplement: c4ra17274d1.pdf [file c4ra17274d1.pdf]
